# Supplementary material for: Self-assembly of tetranuclear 3d–4f helicates as highly efficient catalysts for CO2 cycloaddition reactions under mild conditions
Source: Royal Society of Chemistry journal article supplement (doi:10.1039/d0dt01743d), 2020-01-01
Supplement: d0dt01743d1.pdf [file d0dt01743d1.pdf]

Supporting Information

## **Self-assembly of tetranuclear 3d-4f helicates as highly efficient catalysts for CO<sub>2</sub> cycloaddition reactions under mild conditions**

*Huan Yang<sup>a</sup>, Guoshu Gao<sup>a</sup>, Wanmin Chen<sup>a</sup>, Li Wang<sup>\*b</sup>, and Weisheng Liu<sup>\*a</sup>*

*<sup>a</sup> Key Laboratory of Nonferrous Metals Chemistry and Resources Utilization of Gansu Province and State Key Laboratory of Applied Organic Chemistry, College of Chemistry and Chemical Engineering, Lanzhou University, Lanzhou 730000, P. R. China*

*<sup>b</sup> College of Chemistry and Chemical Engineering, Xi'an Shiyou University, Xi'an 710065, P.R. China*

### **Contents**

- 1. General**
- 2. Structure of ligand and the classical N<sub>2</sub>O<sub>2</sub> pocket**
- 3. Mass Spectra and NMR spectra of the H<sub>2</sub>L**
- 4. IR Spectra of ligand and complexes**
- 5. TGA curves of complexes**
- 6. Crystallography data**
- 7. Wires/Sticks representation of complex in crystal cell**
- 8. Catalytic performance**
- 9. NMR spectra for substrate extension experiments under 120 °C**
- 10. NMR spectra for substrate extension experiments under 80 °C**
- 11. Notes and references**

## 1. Characterization data of H<sub>2</sub>L and catalysts

**Materials and Methods.** Chemicals were purchased from commercial sources and used without further purification. The infrared spectra were recorded on a Bruker VERTEX 70 FT-IR spectrometer using KBr pellets in the 400-4000 cm<sup>-1</sup> region. <sup>1</sup>H and <sup>13</sup>C NMR spectra were recorded using a JNM-ECS 400M spectrometer using CDCl<sub>3</sub> as a solvent and tetramethylsilane (TMS) as an internal standard. The C, H, and N microanalyses were performed by using a Vario EL cube elemental analyzer. TGA/NETZSCH STA449C instrument for thermogravimetric analysis experiments was carried out under nitrogen atmosphere, the test temperature is from 35 °C to 800 °C with the heating rate of 10 °C min<sup>-1</sup>. Single-crystal X-ray diffraction data were collected on a Bruker FRAMBO diffractometer (Mo radiation, λ = 0.71073 Å) at 293 K. Data reduction was accomplished by the Bruker SAINT program. Empirical absorption corrections were carried out on the SADABS program. All the structures were solved by direct methods and refined by a full-matrix least-squares technique based on F<sup>2</sup> of the SHELXL 2018 through Olex 2 program. All the non-hydrogen atoms were refined anisotropically. The organic hydrogen atoms were generated geometrically. The specific data of X-ray crystallography and experiment for the crystal are listed in table S1-S4. For details, see the cif date in the supporting part. The CCDC reference numbers of complexes **1-3** are 1942931-1942933.

## 2. Structure of ligand and the classical N<sub>2</sub>O<sub>2</sub> pocket.

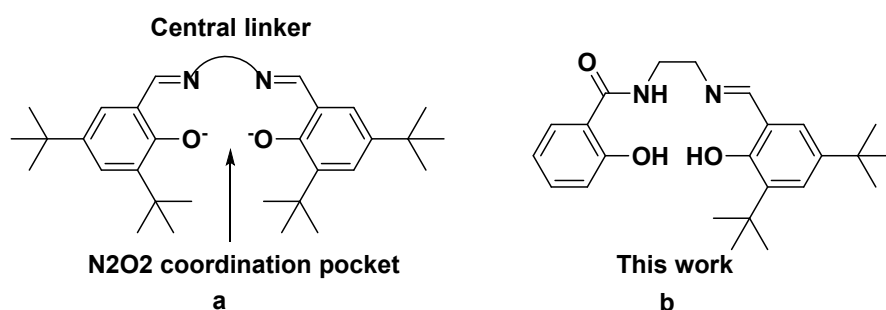

**Figure S1.** (a) General structure of a symmetrical salen ligand. (b) Amide-functionalized asymmetrical salen ligand in this work.

### 3. Mass Spectra and NMR spectra of the H<sub>2</sub>L

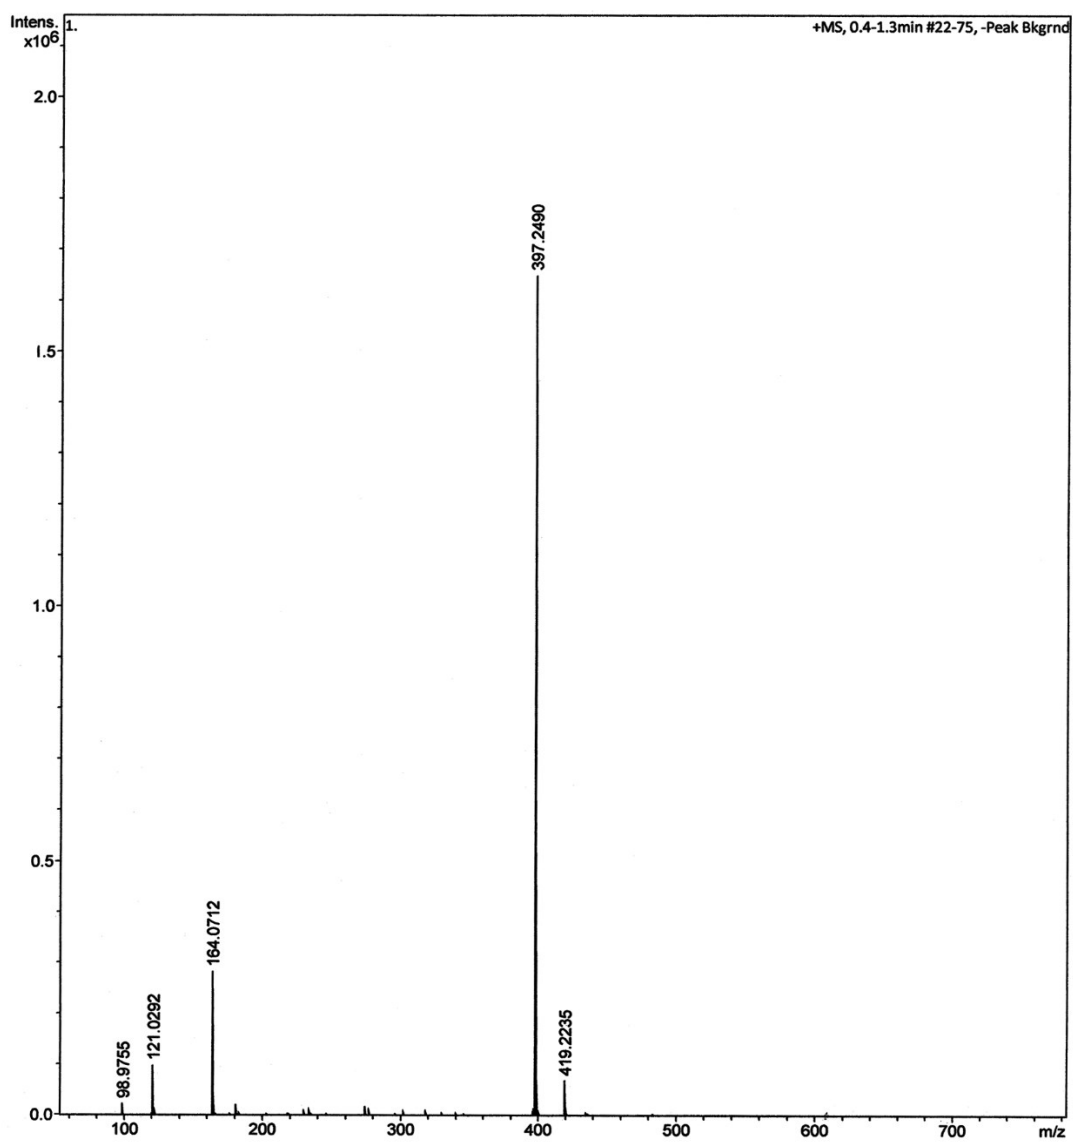

Figure S2. Mass Spectrum of H<sub>2</sub>L.

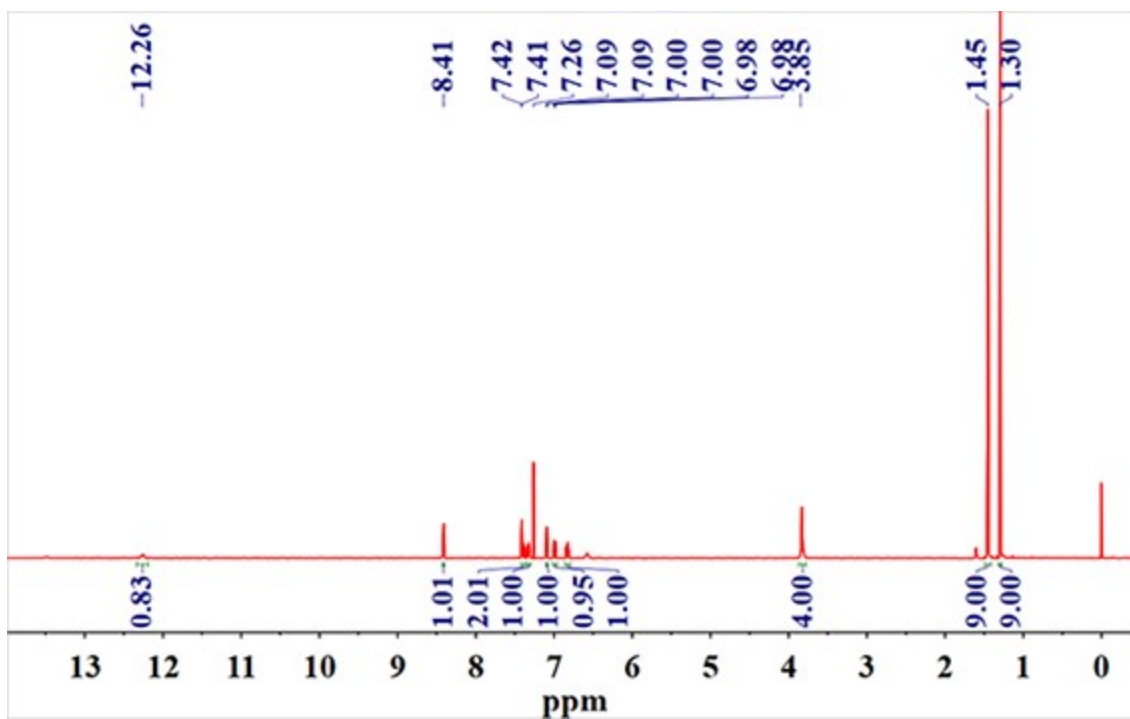

Figure S3.  $^1\text{H}$  NMR Spectrum of  $\text{H}_2\text{L}$ .

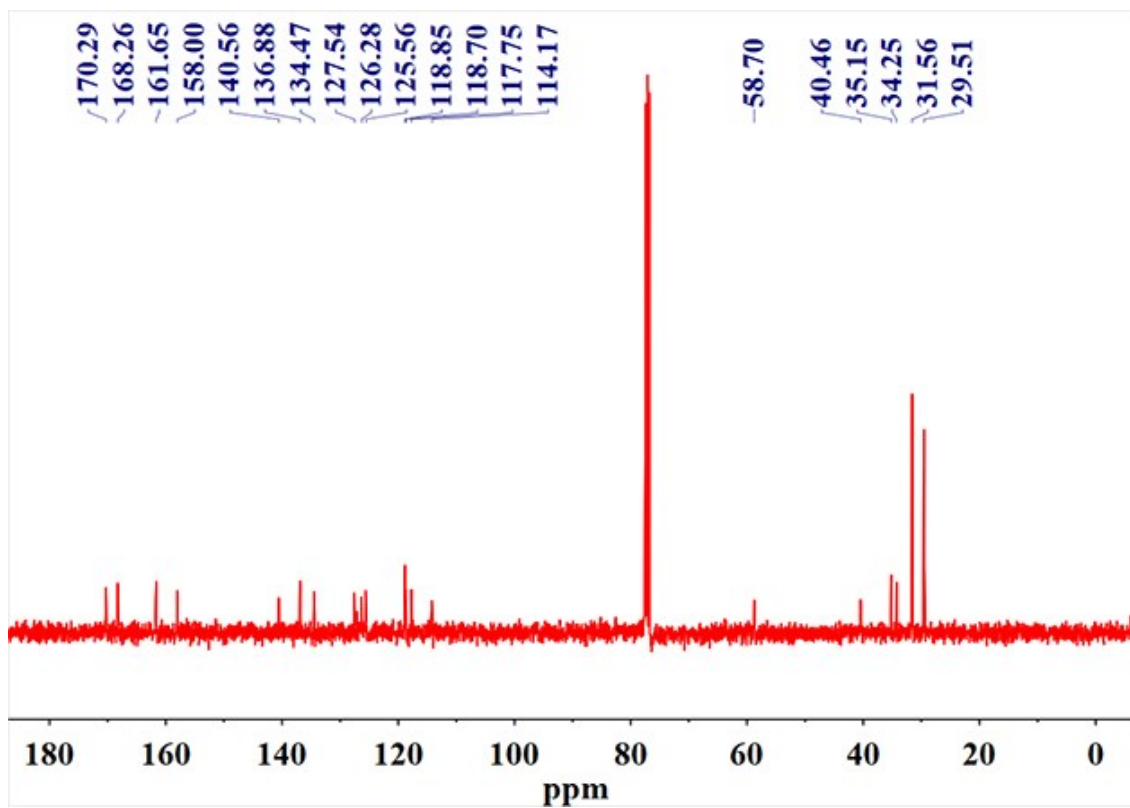

Figure S4.  $^{13}\text{C}$  NMR Spectrum of  $\text{H}_2\text{L}$ .

#### 4. IR Spectra of ligands and helicates

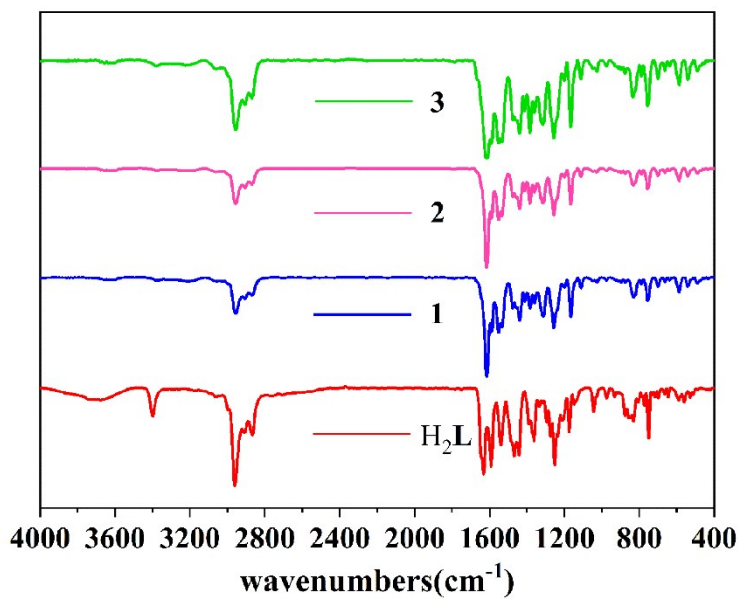

Figure S5. IR of  $\text{H}_2\text{L}$  and complex 1-3.

#### 5. TGA curves of complexes

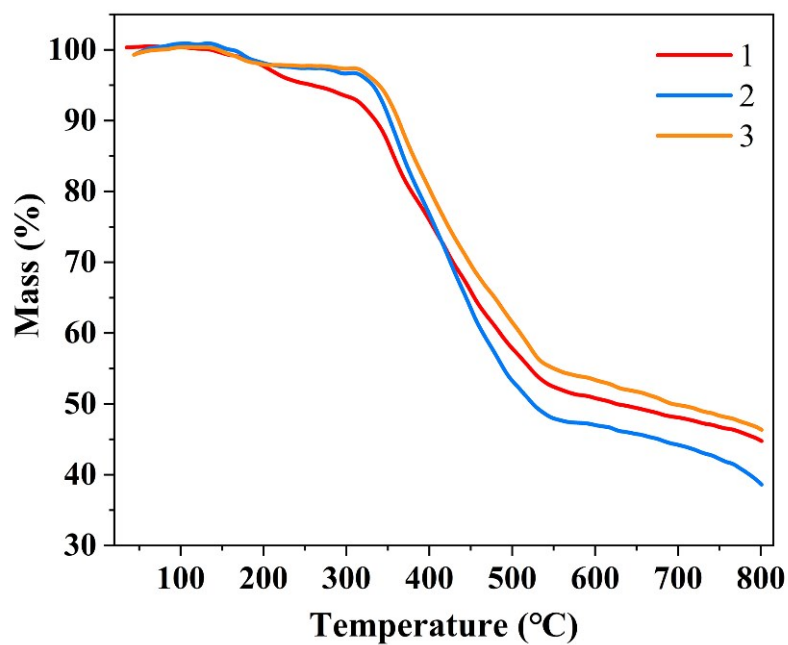

Figure S6. TGA curves of complexes 1-3.

## 6. Single-Crystal X-ray diffraction analysis

**Table S1.** Crystal data and structure refinement parameters for complexes **1-3**

| Compound                                                        | <b>1</b>                                                                           | <b>2</b>                                                                           | <b>3</b>                                                                           |
|-----------------------------------------------------------------|------------------------------------------------------------------------------------|------------------------------------------------------------------------------------|------------------------------------------------------------------------------------|
| Empirical formula                                               | C <sub>98</sub> H <sub>123</sub> DyN <sub>10</sub> O <sub>15</sub> Zn <sub>3</sub> | C <sub>98</sub> H <sub>123</sub> GdN <sub>10</sub> O <sub>15</sub> Zn <sub>3</sub> | C <sub>98</sub> H <sub>123</sub> ErN <sub>10</sub> O <sub>15</sub> Zn <sub>3</sub> |
| Formula weight                                                  | 2039.76                                                                            | 2034.52                                                                            | 2044.51                                                                            |
| T/K                                                             | 291.73(10)                                                                         | 173.00(10)                                                                         | 295.42(10)                                                                         |
| Crystal system                                                  | triclinic                                                                          | triclinic                                                                          | triclinic                                                                          |
| Space group                                                     | <i>P</i> -1                                                                        | <i>P</i> -1                                                                        | <i>P</i> -1                                                                        |
| <i>a</i> /Å                                                     | 15.2010(6)                                                                         | 15.1548(12)                                                                        | 15.2301(4)                                                                         |
| <i>b</i> /Å                                                     | 19.7221(4)                                                                         | 19.2532(17)                                                                        | 19.7361(5)                                                                         |
| <i>c</i> /Å                                                     | 19.7307(5)                                                                         | 19.4848(13)                                                                        | 19.7667(6)                                                                         |
| $\alpha$ /°                                                     | 70.729(2)                                                                          | 72.372(7)                                                                          | 70.414(2)                                                                          |
| $\beta$ /°                                                      | 87.962(3)                                                                          | 85.842(6)                                                                          | 87.940(2)                                                                          |
| $\gamma$ /°                                                     | 85.124(2)                                                                          | 89.624(7)                                                                          | 85.250(2)                                                                          |
| <i>V</i> /Å <sup>3</sup>                                        | 5563.4(3)                                                                          | 5403.3(8)                                                                          | 5578.3(3)                                                                          |
| <i>Z</i>                                                        | 2                                                                                  | 2                                                                                  | 2                                                                                  |
| <i>D</i> <sub>calc</sub> /Mg m <sup>-3</sup>                    | 1.218                                                                              | 1.282                                                                              | 1.236                                                                              |
| <i>F</i> (000)                                                  | 2114.0                                                                             | 2162.0                                                                             | 2154.0                                                                             |
| $\vartheta$ range for data collection                           | 6.546 to 50.02°                                                                    | 6.6 to 52.044°                                                                     | 6.586 to 50.02°                                                                    |
| Data/restraints/parameters                                      | 19482/144/1211                                                                     | 21257/80/1204                                                                      | 19441/78/1218                                                                      |
| Goodness-of-fit on <i>F</i> <sup>2</sup>                        | 0.850                                                                              | 1.043                                                                              | 1.032                                                                              |
| Final <i>R</i> indices [ <i>I</i> >2σ( <i>I</i> )] <sup>a</sup> | <i>R</i> <sub>1</sub> =0.0637,                                                     | <i>R</i> <sub>1</sub> =0.0649,                                                     | <i>R</i> <sub>1</sub> =0.0550,                                                     |
| <i>R</i> indices (all data) <sup>b</sup>                        | <i>R</i> <sub>1</sub> =0.1007,                                                     | <i>R</i> <sub>1</sub> =0.1137,                                                     | <i>R</i> <sub>1</sub> =0.0838,                                                     |
| Largest diff. peak/hole/e. Å <sup>-3</sup>                      | 1.31/-1.01                                                                         | 1.74/-0.91                                                                         | 1.19/-0.93                                                                         |

<sup>a</sup> $R_1 = \sum ||F_o| - |F_c| | / \sum |F_o|$ ; <sup>b</sup> $wR_2 = \sum [w(F_o^2 - F_c^2)^2] / \sum [w(F_o^2)^2]^{1/2}$

**Table S2.** Selected bond lengths (Å) for complexes **1-3**

| <b>Zn<sub>3</sub>DyL<sub>4</sub> (1)</b> |             |            |             |             |             |
|------------------------------------------|-------------|------------|-------------|-------------|-------------|
| Dy1—Zn2                                  | 3.3230 (8)  | Dy1—O1     | 2.382 (4)   | Zn1—O4      | 1.969 (4)   |
| Dy1—Zn1                                  | 3.3305 (8)  | Dy1—O4     | 2.396 (4)   | Zn1—N2      | 1.991 (6)   |
| Dy1—O11                                  | 2.289 (5)   | Zn2—O6     | 1.911 (4)   | Zn3—O9      | 2.038 (4)   |
| Dy1—O10                                  | 2.406 (4)   | Zn2—O10    | 1.956 (4)   | Zn3—O44     | 2.090 (7)   |
| Dy1—O7                                   | 2.370 (4)   | Zn2—O1     | 1.966 (4)   | Zn3—N6      | 2.085 (6)   |
| Dy1—O2                                   | 2.291 (4)   | Zn2—N4     | 1.993 (5)   | Zn3—O12     | 2.049 (4)   |
| Dy1—O5                                   | 2.291 (4)   | Zn1—O3     | 1.910 (4)   | Zn3—N8      | 2.076 (6)   |
| Dy1—O8                                   | 2.282 (4)   | Zn1—O7     | 1.971 (4)   |             |             |
| O11—Dy1—O10                              | 72.06 (14)  | O7—Dy1—O10 | 136.23 (15) | O5—Dy1—O10  | 73.76 (15)  |
| O11—Dy1—O7                               | 77.53 (15)  | O7—Dy1—O1  | 131.63 (14) | O5—Dy1—O7   | 140.39 (14) |
| O11—Dy1—O2                               | 147.74 (15) | O7—Dy1—O4  | 69.86 (14)  | O5—Dy1—O2   | 96.42 (17)  |
| O11—Dy1—O5                               | 94.72 (17)  | O2—Dy1—O10 | 140.20 (15) | O5—Dy1—O1   | 76.64 (15)  |
| O11—Dy1—O1                               | 141.81 (14) | O2—Dy1—O7  | 74.61 (16)  | O5—Dy1—O4   | 70.54 (14)  |
| O11—Dy1—O4                               | 80.01 (16)  | O2—Dy1—O1  | 70.40 (14)  | O8—Dy1—O7   | 72.42 (14)  |
| O2—Dy1—O4                                | 75.40 (15)  | O1—Dy1—O10 | 69.80 (14)  | O8—Dy1—O2   | 98.53 (16)  |
| O8—Dy1—O11                               | 88.17 (16)  | O1—Dy1—O4  | 128.80 (15) | O8—Dy1—O5   | 146.87 (15) |
| O8—Dy1—O10                               | 75.83 (14)  | O4—Dy1—O10 | 132.03 (14) | O8—Dy1—O1   | 80.82 (15)  |
| O8—Dy1—O4                                | 142.06 (15) | O6—Zn2—O1  | 119.10 (17) | O9—Zn3—N6   | 86.4 (2)    |
| O3—Zn1—O4                                | 117.71 (18) | O6—Zn2—N4  | 97.0 (2)    | O9—Zn3—O12  | 171.2 (2)   |
| O3—Zn1—N2                                | 96.3 (2)    | O1—Zn2—N4  | 118.8 (2)   | O9—Zn3—N8   | 89.8 (2)    |
| O7—Zn1—N2                                | 117.2 (2)   | O10—Zn2—O1 | 88.62 (18)  | N6—Zn3—O44  | 117.9 (3)   |
| O4—Zn1—O7                                | 87.65 (17)  | O10—Zn2—N4 | 120.9 (2)   | O12—Zn3—O44 | 91.9 (2)    |
| O4—Zn1—N2                                | 123.5 (2)   | N8—Zn3—N6  | 137.5 (3)   | O12—Zn3—N6  | 91.4 (2)    |
| O3—Zn1—O7                                | 116.4 (2)   | N8—Zn3—O44 | 104.6 (3)   | O12—Zn3—N8  | 86.0 (2)    |

**Table S3.** Selected bond lengths (Å) for complex **2**

| <b>Zn<sub>3</sub>GdL<sub>4</sub> (2)</b> |             |            |             |             |             |
|------------------------------------------|-------------|------------|-------------|-------------|-------------|
| Zn1—O6                                   | 1.905 (3)   | Zn2—O3     | 1.907 (4)   | Zn3—O12     | 2.031 (4)   |
| Zn1—O7                                   | 1.951 (4)   | Zn2—O10    | 1.978 (3)   | Zn3—N8      | 2.078 (5)   |
| Zn1—O1                                   | 1.967 (3)   | Zn2—O4     | 1.969 (3)   | Zn3—O13     | 2.104 (5)   |
| Zn1—N4                                   | 1.989 (4)   | Zn2—N2     | 1.988 (4)   | Zn3—O9      | 2.047 (4)   |
| Zn3—N6                                   | 2.073 (5)   | Gd1—O8     | 2.314 (4)   | Gd1—O11     | 2.314 (3)   |
| Gd1—O1                                   | 2.399 (4)   | Gd1—O7     | 2.419 (3)   | Gd1—O4      | 2.402 (3)   |
| Gd1—O5                                   | 2.312 (3)   | Gd1—O10    | 2.376 (3)   | Gd1—O2      | 2.310 (3)   |
| O8—Gd1—O7                                | 71.76 (12)  | O10—Gd1—O7 | 136.30 (11) | O2—Gd1—O10  | 74.62 (12)  |
| O8—Gd1—O10                               | 77.92 (12)  | O10—Gd1—O1 | 131.85 (12) | O2—Gd1—O1   | 70.13 (12)  |
| O8—Gd1—O1                                | 141.43 (11) | O10—Gd1—O4 | 69.93 (12)  | O2—Gd1—O5   | 96.80 (13)  |
| O8—Gd1—O11                               | 88.60 (13)  | O2—Gd1—O8  | 148.39 (13) | O2—Gd1—O11  | 97.37 (13)  |
| O8—Gd1—O4                                | 80.30 (12)  | O2—Gd1—O7  | 139.83 (13) | O11—Gd1—O7  | 76.64 (11)  |
| O2—Gd1—O4                                | 75.82 (12)  | O5—Gd1—O10 | 140.00 (12) | O11—Gd1—O10 | 71.83 (12)  |
| O1—Gd1—O7                                | 69.70 (11)  | O5—Gd1—O1  | 76.76 (12)  | O11—Gd1—O1  | 81.21 (12)  |
| O1—Gd1—O4                                | 128.47 (12) | O5—Gd1—O11 | 147.87 (12) | O11—Gd1—O4  | 141.60 (12) |
| O5—Gd1—O8                                | 94.20 (13)  | O5—Gd1—O4  | 70.10 (12)  | O4—Gd1—O7   | 132.06 (11) |
| O5—Gd1—O7                                | 73.94 (12)  | O6—Zn1—N4  | 97.04 (16)  | O6—Zn1—O7   | 114.17 (15) |
| O7—Zn1—N4                                | 120.94 (17) | O7—Zn1—O1  | 89.26 (14)  | O6—Zn1—O1   | 118.77 (15) |
| O1—Zn1—N4                                | 118.56 (16) | O3—Zn2—O10 | 115.62 (15) |             |             |



**Table S4.** Selected bond lengths (Å) for complex **3**

| <b>Zn<sub>3</sub>ErL<sub>4</sub> (3)</b> |             |            |             |             |             |
|------------------------------------------|-------------|------------|-------------|-------------|-------------|
| Zn3—O12                                  | 2.050 (4)   | Zn2—O6     | 1.907 (4)   | Zn1—O3      | 1.910 (5)   |
| Zn3—O9                                   | 2.047 (4)   | Zn2—O10    | 1.954 (4)   | Zn1—N2      | 1.991 (5)   |
| Zn3—O15                                  | 2.081 (4)   | Zn2—O1     | 1.959 (4)   | Zn1—O7      | 1.965 (4)   |
| Zn3—N7                                   | 2.084 (5)   | Zn2—N4     | 2.005 (5)   | Zn1—O4      | 1.957 (4)   |
| Zn3—N6                                   | 2.066 (5)   | O5—Er1     | 2.290 (4)   | O2—Er1      | 2.290 (4)   |
| O8—Er1                                   | 2.264 (4)   | O10—Er1    | 2.380 (4)   | O1—Er1      | 2.355 (4)   |
| O4—Er1                                   | 2.369 (4)   | Er1—O11    | 2.266 (4)   | O7—Er1      | 2.333 (4)   |
| O3—Zn1—N2                                | 96.4 (2)    | O6—Zn2—O10 | 115.03 (17) | O12—Zn3—O15 | 92.38 (19)  |
| O3—Zn1—O7                                | 116.72 (18) | O6—Zn2—O1  | 119.25 (18) | O12—Zn3—N6  | 92.3 (2)    |
| O3—Zn1—O4                                | 117.12 (19) | O6—Zn2—N4  | 97.0 (2)    | O9—Zn3—O12  | 170.85 (16) |
| O7—Zn1—N2                                | 116.6 (2)   | O10—Zn2—O1 | 88.36 (17)  | O9—Zn3—O15  | 96.08 (18)  |
| O4—Zn1—N2                                | 124.9 (2)   | O10—Zn2—N4 | 118.5 (2)   | O9—Zn3—N6   | 86.51 (19)  |
| O4—Zn1—O7                                | 86.96 (17)  | O1—Zn2—N4  | 120.6 (2)   | N6—Zn3—O15  | 120.1 (2)   |
| O8—Er1—O5                                | 145.55 (15) | O5—Er1—O7  | 141.20 (15) | O7—Er1—O1   | 131.06 (15) |
| O8—Er1—O10                               | 75.10 (14)  | O5—Er1—O4  | 71.17 (15)  | O7—Er1—O4   | 70.03 (15)  |
| O8—Er1—O2                                | 100.78 (15) | O2—Er1—O10 | 141.03 (15) | O4—Er1—O10  | 131.31 (14) |
| O8—Er1—O1                                | 81.25 (15)  | O2—Er1—O1  | 70.74 (15)  | O11—Er1—O5  | 95.04 (15)  |
| O8—Er1—O7                                | 72.91 (14)  | O2—Er1—O7  | 74.21 (16)  | O11—Er1—O10 | 72.78 (14)  |
| O8—Er1—O4                                | 142.46 (15) | O2—Er1—O4  | 74.78 (15)  | O11—Er1—O2  | 146.17 (15) |
| O8—Er1—O11                               | 87.93 (14)  | O1—Er1—O10 | 70.34 (14)  | O11—Er1—O1  | 143.09 (14) |
| O5—Er1—O10                               | 73.11 (14)  | O1—Er1—O4  | 128.88 (14) | O11—Er1—O7  | 77.40 (14)  |
| O5—Er1—O2                                | 95.65 (16)  | O7—Er1—O10 | 136.54 (13) | O11—Er1—O4  | 78.53 (14)  |
| O5—Er1—O1                                | 75.91 (16)  |            |             |             |             |

## 7. Diagram of crystal structure

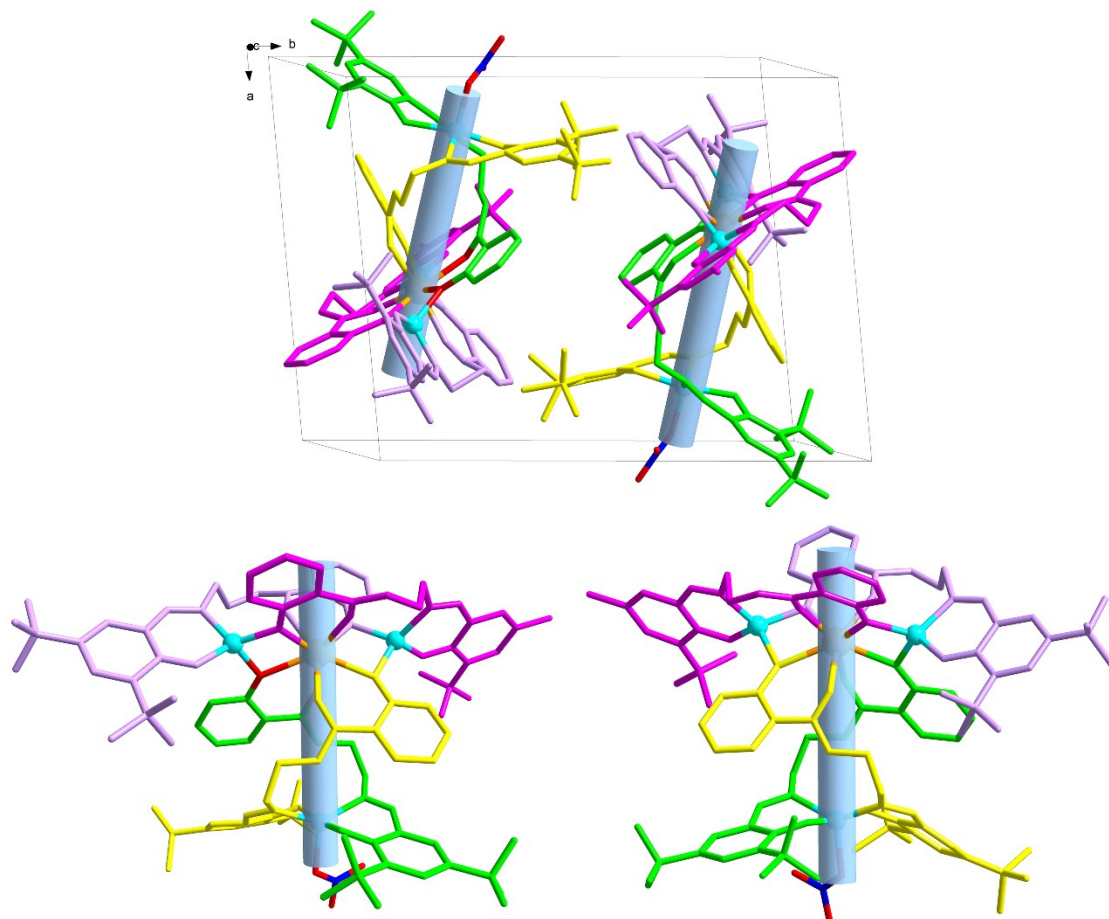

**Figure S7.** Wires/Sticks representation of complex **3** in crystal cell, in which two kinds of lanthanide helicates with *M* helical configuration and *P* helical configuration arranged and self-assembled alternatively. All hydrogen atoms, solvent molecules and uncoordinated anions are omitted for clarity.

## 8. Catalytic performance

**Table S5.** Representative homogeneous and heterogeneous catalysts with high TOF used for the synthesis of cyclic carbonates

| Cat.                                                                    | Co-cat.        | Epoxide<br>(Mole ratio)        | T<br>(°C) | P<br>(MPa) | Time<br>(h) | Yield<br>(%) | TOF<br>(h <sup>-1</sup> ) |
|-------------------------------------------------------------------------|----------------|--------------------------------|-----------|------------|-------------|--------------|---------------------------|
| Zn(OPO) <sub>2</sub> <sup>1</sup>                                       | TBAB<br>(0.9)  | (propylene epoxide)<br>1:40000 | 120       | 3          | 1           | 46           | 18400                     |
| Zn-CMP <sup>2</sup>                                                     | TBAB<br>(0.9)  | (propylene epoxide)<br>1:40000 | 120       | 3          | 1           | 29           | 11600                     |
| ZnBr <sub>2</sub> <sup>3</sup>                                          | -              | (propylene epoxide)<br>1:1790  | 140       | 3          | 1           | 81           | 8670                      |
| Ni(PPh <sub>3</sub> )Cl <sub>2</sub> /PPh <sub>3</sub> /Zn <sup>4</sup> | TBAB           | (propylene epoxide)<br>1:3570  | 120       | 2.5        | 1           | 99           | 3544                      |
| Yb-mesocate <sup>5</sup>                                                | TBAB<br>(0.75) | (styrene oxide)<br>1:1000      | 120       | 1          | 2.5         | 95           | 380                       |
| Helicate-1(Zn-Tb) <sup>6</sup>                                          | TBAB<br>(0.5)  | (styrene oxide)<br>1:40000     | 120       | 1          | 1           | 67           | 26800                     |
| <b>3 (This work)</b>                                                    | TBAB<br>(0.8)  | (styrene oxide)<br>1:50000     | 120       | 1          | 2           | 86           | 21500                     |

## 9. <sup>1</sup>H NMR spectra of substrates and products under 120 °C<sup>7-12</sup>

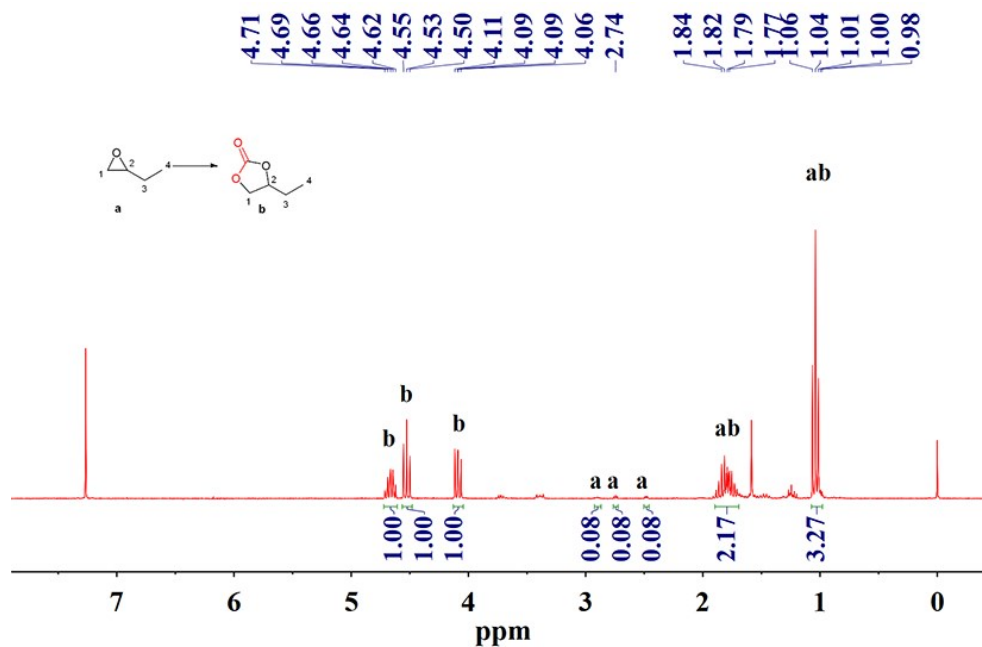

<sup>1</sup>H NMR (400 MHz, CDCl<sub>3</sub>): H<sup>b2</sup> δ 4.72 – 4.61 (m, 1H.), H<sup>b1</sup> δ 4.53 (t, *J* = 8.1 Hz, 1H), H<sup>b1'</sup> δ 4.09 (dd, *J* = 8.3, 7.0 Hz, 1H), H<sup>b3</sup> δ 1.90 – 1.69 (m, 2H), H<sup>b4</sup> δ 1.07 – 0.98 (m, 3H). [(M+H)<sup>+</sup>]: 117.1 (calculated m/z 116.1).

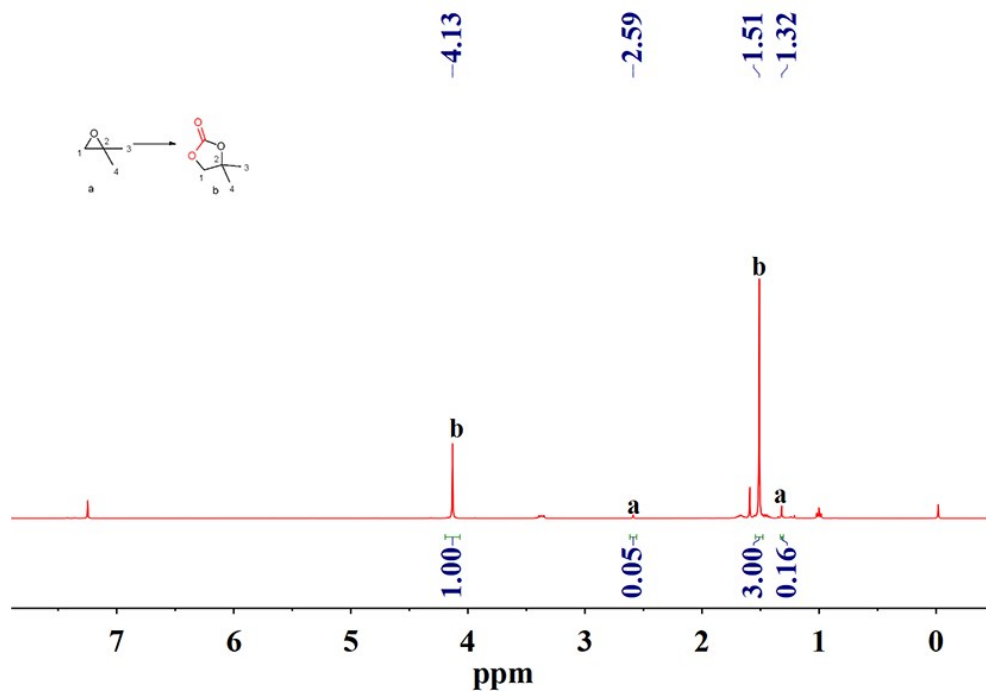

$^1\text{H NMR}$  (400 MHz,  $\text{CDCl}_3$ ):  $\text{H}^{\text{b1}}$   $\delta$  4.13 (s, 2H),  $\text{H}^{\text{b3}}$  and  $\text{H}^{\text{b4}}$   $\delta$  1.51 (s, 6H).  $[(\text{M}+\text{H})^+]$ : 117.0 (calculated  $m/z$  116.1).

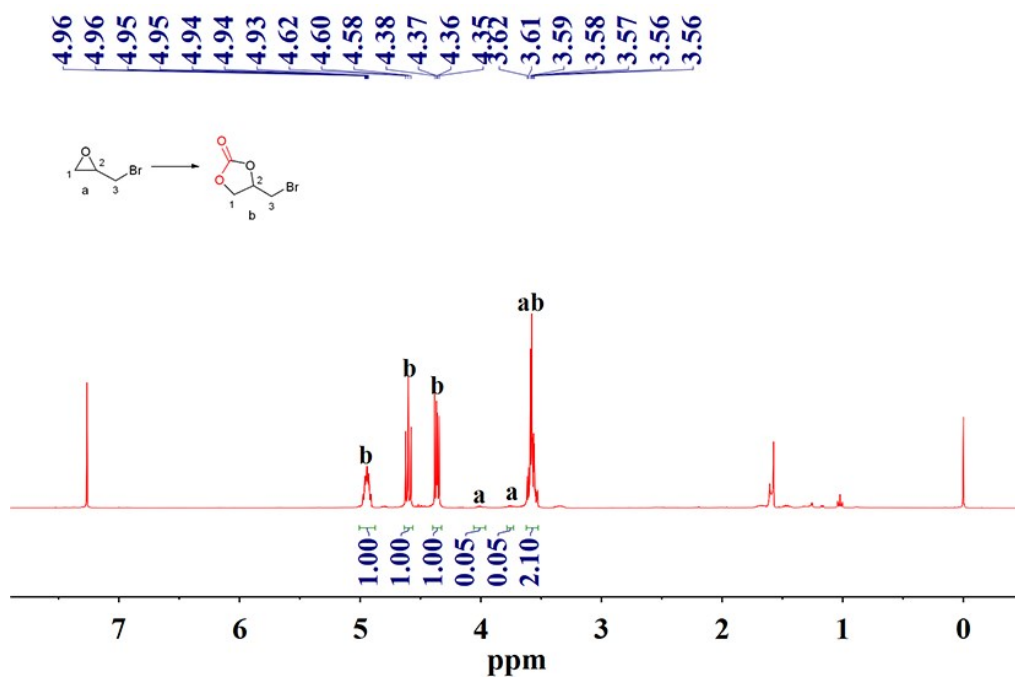

$^1\text{H NMR}$  (400 MHz,  $\text{CDCl}_3$ ):  $\text{H}^{\text{b2}}$   $\delta$  4.95 (ddt, 1H),  $\text{H}^{\text{b2}}$   $\delta$  4.60 (t,  $J = 8.5$  Hz, 1H),  $\text{H}^{\text{b1}}$   $\delta$  4.36 (dd,  $J = 8.8, 5.9$  Hz, 1H),  $\text{H}^{\text{b3}}$   $\delta$  3.80 – 3.28 (m, 2H).  $[(\text{M}+\text{H})^+]$ : 180.8 (calculated  $m/z$  179.9).

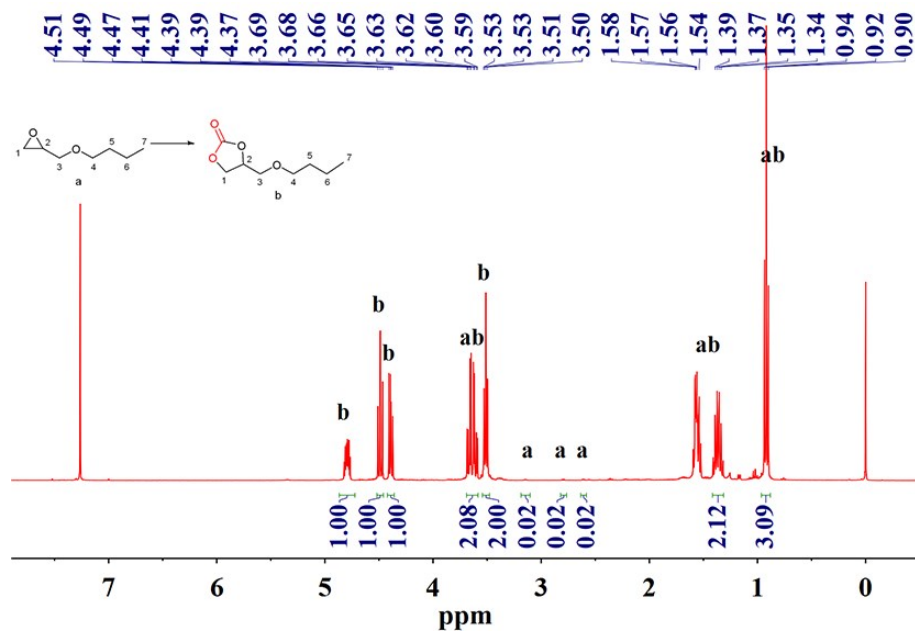

$^1\text{H}$  NMR (400 MHz,  $\text{CDCl}_3$ ):  $\text{H}^{\text{b}2}$   $\delta$  (ddt,  $J = 8.0, 6.0, 3.9$  Hz, 1H),  $\text{H}^{\text{b}1}$   $\delta$  4.49 (t,  $J = 8.4$  Hz, 1H),  $\text{H}^{\text{b}1}$   $\delta$  4.39 (dd,  $J = 8.3, 6.0$  Hz, 1H),  $\text{H}^{\text{b}3}$   $\delta$  3.64 (qd,  $J = 10.9, 3.9$  Hz, 2H),  $\text{H}^{\text{b}4}$  3.51 (t, 2H),  $\text{H}^{\text{b}3}$  1.44 – 1.29 (m, 2H),  $\text{H}^{\text{b}7}$  0.92 (t,  $J = 7.4$  Hz, 3H). Due to the influence of moisture in  $\text{CDCl}_3$ ,  $\text{H}^{\text{b}5}$  is not discussed.  $[(\text{M}+\text{H})^+]$ : 175.0 (calculated  $m/z$  174.2).

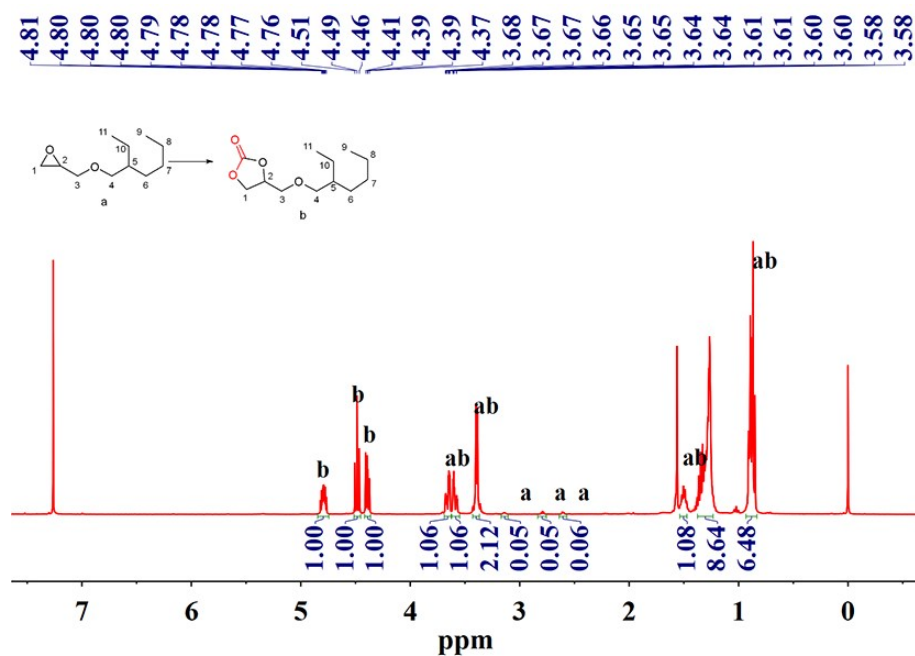

$^1\text{H}$  NMR (400 MHz,  $\text{CDCl}_3$ ):  $\text{H}^{\text{b}2}$   $\delta$  4.79 (ddt,  $J = 8.0, 6.0, 3.8$  Hz, 1H),  $\text{H}^{\text{b}1}$   $\delta$  4.49 (t,  $J = 8.3$  Hz, 1H),  $\text{H}^{\text{b}1}$   $\delta$  4.39 (dd,  $J = 8.2, 6.0$  Hz, 1H),  $\text{H}^{\text{b}3}$   $\delta$  3.62 (dddd,  $J = 26.9, 10.9, 3.7, 2.0$  Hz, 2H),  $\text{H}^{\text{b}4}$   $\delta$  3.40 (dd, 2H), 1.50 (dd,  $J = 11.8, 5.9$  Hz, 1H), 1.42 – 1.19 (m, 8H), 0.88 (dt,  $J = 10.2, 7.0$  Hz, 6H).  $[(\text{M}+\text{H})^+]$ : 231.2 (calculated  $m/z$  230.3).

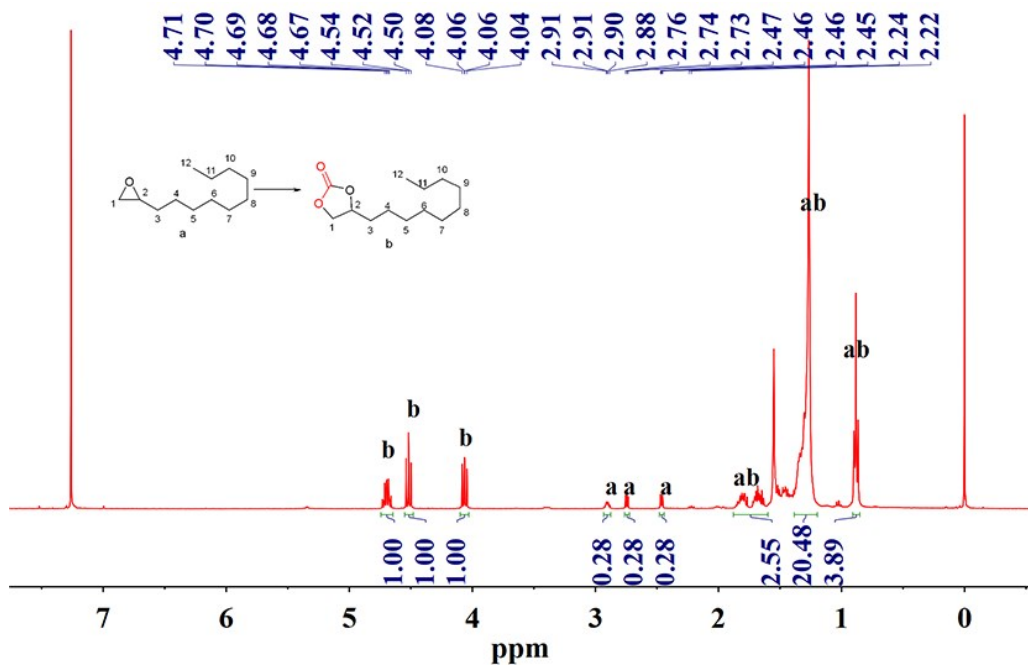

$^1\text{H}$  NMR (400 MHz,  $\text{CDCl}_3$ ):  $\text{H}^{\text{b}2}$   $\delta$  4.69 (ddt, 1H),  $\text{H}^{\text{b}1}$   $\delta$  4.52 (t,  $J = 8.1$  Hz, 1H),  $\text{H}^{\text{b}1}$   $\delta$  4.06 (dd,  $J = 8.4, 7.3$  Hz, 1H),  $\text{H}^{\text{b}2}$   $\delta$  1.81 (ddd,  $J = 14.2, 10.4, 5.3$  Hz, 1H),  $\text{H}^{\text{b}2}$   $\delta$  1.68 (ddd,  $J = 14.2, 10.4, 5.3$  Hz, 1H), 1.43 – 1.17 (m, 16H), 0.88 (t,  $J = 6.8$  Hz, 3H).  $[(\text{M}+\text{H})^+]$ : 229.1 (calculated  $m/z$  228.17).

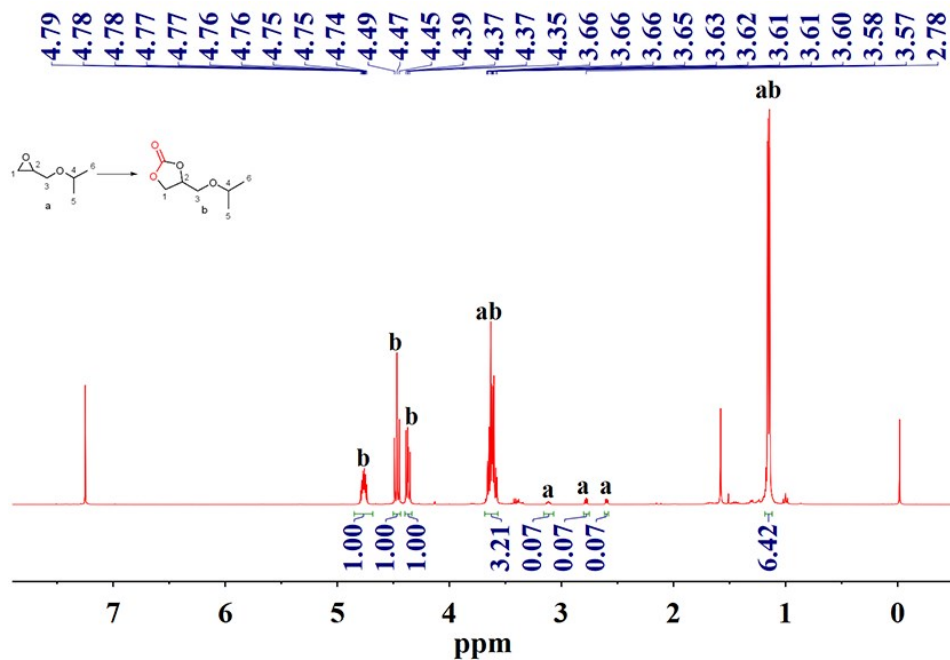

$^1\text{H}$  NMR (400 MHz,  $\text{CDCl}_3$ ):  $\text{H}^{\text{b}2}$   $\delta$  4.76 (ddt,  $J = 8.2, 6.0, 4.1$  Hz, 1H),  $\text{H}^{\text{b}1}$   $\delta$  4.47 (t,  $J = 8.3$  Hz, 1H),  $\text{H}^{\text{b}1}$   $\delta$  4.37 (dd,  $J = 8.3, 6.0$  Hz, 1H),  $\text{H}^{\text{b}3}$  and  $\text{H}^{\text{b}4}$   $\delta$  3.77 – 3.50 (m, 3H), 1.15 (d,  $J = 1.6$  Hz, 6H).  $[(\text{M}+\text{H})^+]$ : 162.0 (calculated  $m/z$  161.1).

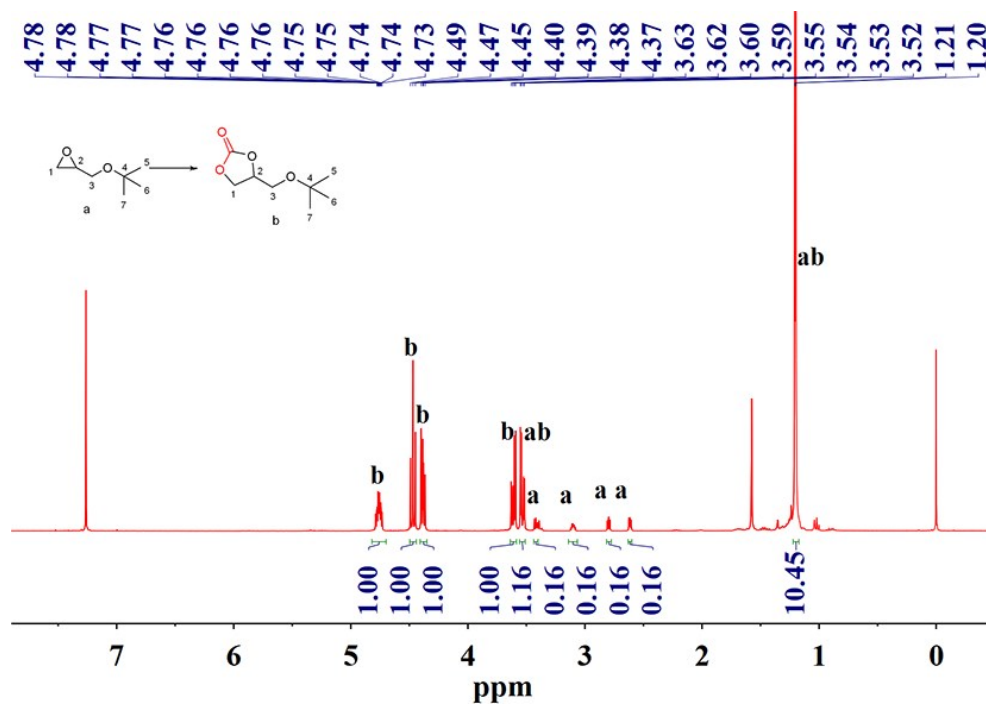

$^1\text{H NMR}$  (400 MHz,  $\text{CDCl}_3$ ):  $\text{H}^{\text{b}2}$   $\delta$  4.76 (ddt,  $J = 8.3, 5.7, 4.7, 3.7$  Hz, 1H), 4.47 (t,  $J = 8.3$  Hz, 1H), 4.38 (dd,  $J = 8.3, 5.7$  Hz, 1H), 3.57 (ddd,  $J = 13.8, 10.3, 4.2$  Hz, 2H), 1.20 (s, 9H).  $[(\text{M}+\text{H})^+]$ : 175.0 (calculated  $m/z$  174.1).

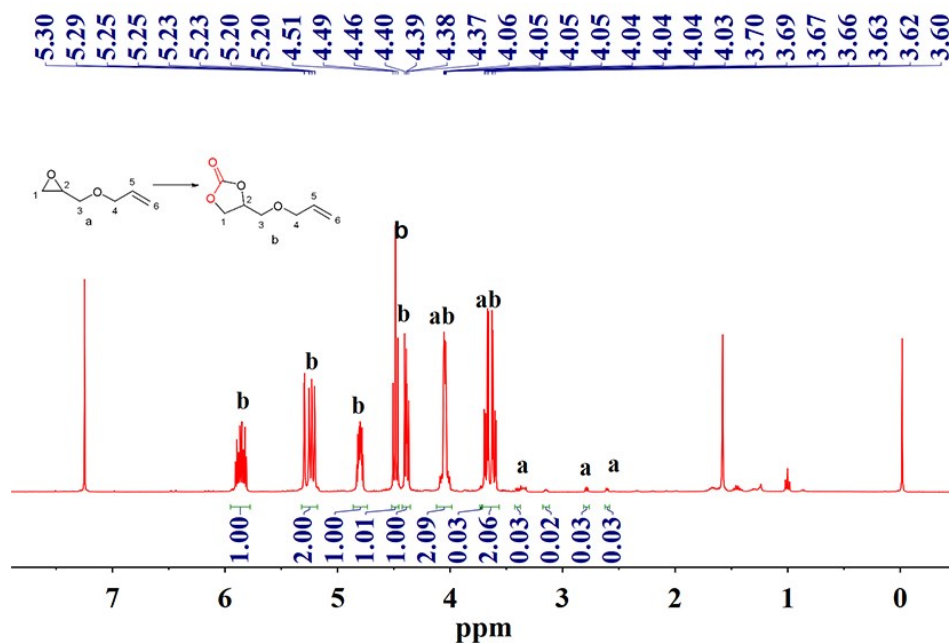

$^1\text{H NMR}$  (400 MHz,  $\text{CDCl}_3$ ):  $\text{H}^{\text{b}5}$   $\delta$  5.97 – 5.77 (m, 1H),  $\text{H}^{\text{b}6}$   $\delta$  5.38 – 5.15 (m, 2H),  $\text{H}^{\text{b}2}$   $\delta$  (ddt,  $J = 8.4, 6.0, 3.9$  Hz, 1H),  $\text{H}^{\text{b}1}$   $\delta$  4.49 (t,  $J = 8.4$  Hz, 1H),  $\text{H}^{\text{b}1}$   $\delta$  4.39 (dd,  $J = 8.4, 6.0$  Hz, 1H),  $\text{H}^{\text{b}4}$   $\delta$  4.09 – 3.96 (m, 2H),  $\text{H}^{\text{b}3}$   $\delta$  3.64 (ddd,  $J = 26.7, 11.0, 3.9$  Hz, 2H).  $[(\text{M}+\text{H})^+]$ : 158.9 (calculated  $m/z$  158.1)..

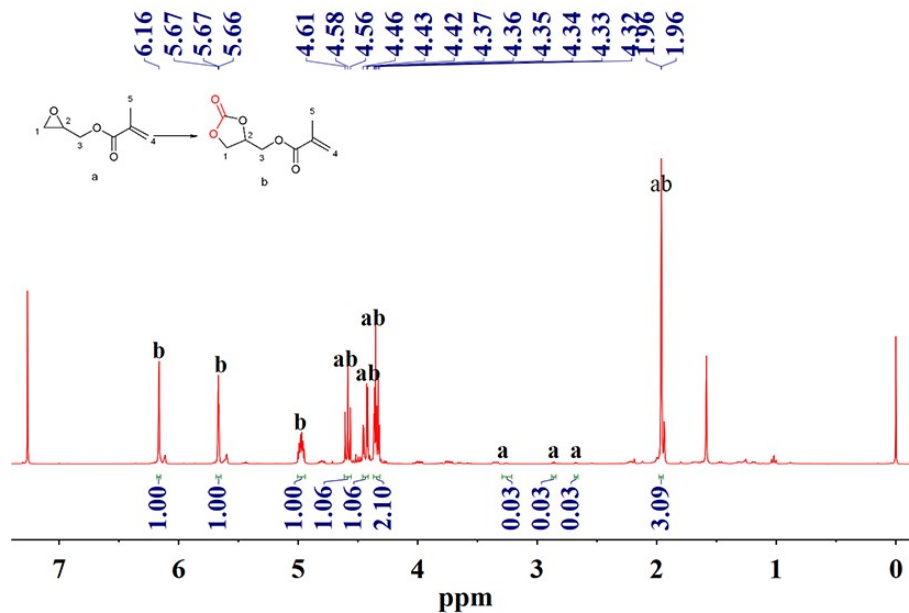

$^1\text{H}$  NMR (400 MHz,  $\text{CDCl}_3$ ):  $\text{H}^{\text{b4}}$   $\delta$  6.16 (s, 1H),  $\text{H}^{\text{b4}}$   $\delta$  5.68 – 5.64 (m, 1H),  $\text{H}^{\text{b2}}$   $\delta$  4.98 (ddt,  $J$  = 8.0, 6.0, 3.9 Hz, 1H),  $\text{H}^{\text{b1}}$   $\delta$  4.58 (t,  $J$  = 8.0 Hz, 1H),  $\text{H}^{\text{b1}}$   $\delta$  4.36 (dd,  $J$  = 6.3, 2.4 Hz, 1H),  $\text{H}^{\text{b3}}$   $\delta$  4.09 (dd,  $J$  = 8.0, 6.0 Hz, 1H),  $\text{H}^{\text{b3}}$   $\delta$  4.33 (t,  $J$  = 4.8 Hz, 1H),  $\text{H}^{\text{b5}}$   $\delta$  1.96 (d,  $J$  = 1.0 Hz, 3H).  $[(\text{M}+\text{H})^+]$ : 186.9 (calculated  $m/z$  186.1).

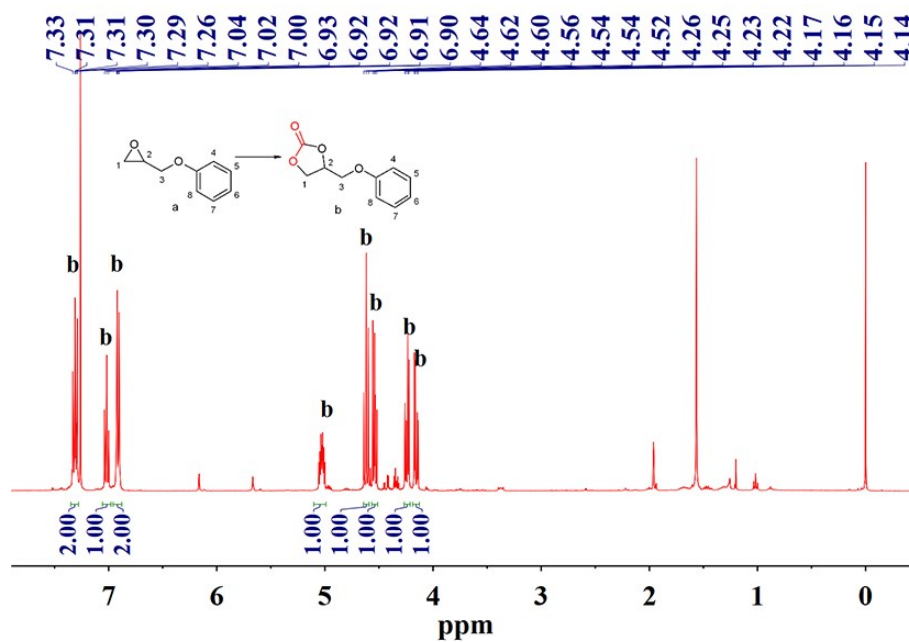

$^1\text{H}$  NMR (400 MHz,  $\text{CDCl}_3$ ):  $\text{H}^{\text{b5}}$  and  $\text{H}^{\text{b7}}$   $\delta$  7.42 – 7.28 (m, 2H),  $\text{H}^{\text{b6}}$   $\delta$  7.10 – 6.99 (m, 1H),  $\text{H}^{\text{b3}}$  and  $\text{H}^{\text{b8}}$   $\delta$  6.91 (dt,  $J$  = 9.2, 2.2 Hz, 1H),  $\text{H}^{\text{b2}}$   $\delta$  5.02 (ddt,  $J$  = 8.4, 6.0, 4 Hz, 1H),  $\text{H}^{\text{b1}}$   $\delta$  4.62 (t,  $J$  = 8.4 Hz, 1H),  $\text{H}^{\text{b1}}$   $\delta$  4.54 (dd,  $J$  = 8.4, 6.0 Hz, 1H),  $\text{H}^{\text{b3}}$   $\delta$  4.24 (dd,  $J$  = 10.5, 4.0 Hz, 1H),  $\text{H}^{\text{b3}}$   $\delta$  4.16 (dd,  $J$  = 10.6, 3.6 Hz, 1H).  $[(\text{M}+\text{H})^+]$ : 194.9 (calculated  $m/z$  194.1).



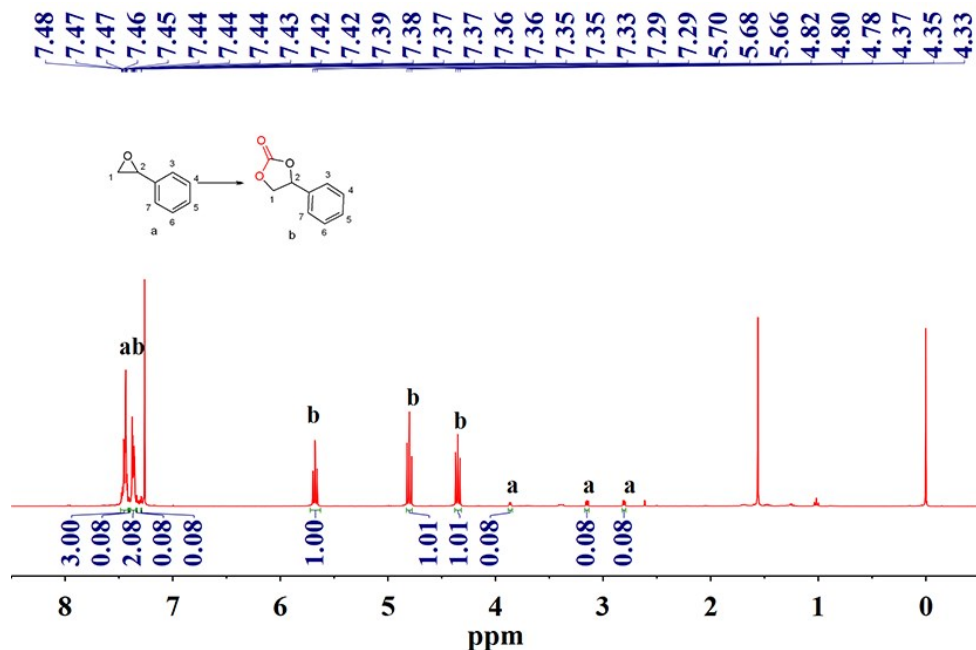

$^1\text{H NMR}$  (400 MHz,  $\text{CDCl}_3$ ):  $\text{H}^{\text{b}3}$ ,  $\text{H}^{\text{b}5}$  and  $\text{H}^{\text{b}7}$   $\delta$  7.50 – 7.40 (m, 3H),  $\text{H}^{\text{b}4}$  and  $\text{H}^{\text{b}6}$   $\delta$  7.40 – 7.32 (m, 2H),  $\text{H}^{\text{b}2}$   $\delta$  5.68 (t,  $J$  = 8.4 Hz, 1H),  $\text{H}^{\text{b}1}$   $\delta$  4.80 (t,  $J$  = 8.4 Hz, 1H),  $\text{H}^{\text{b}1}$   $\delta$  4.36 (t,  $J$  = 8.4 Hz, 1H).  $[(\text{M}+\text{H})^+]$ : 164.9 (calculated  $m/z$  164.0).

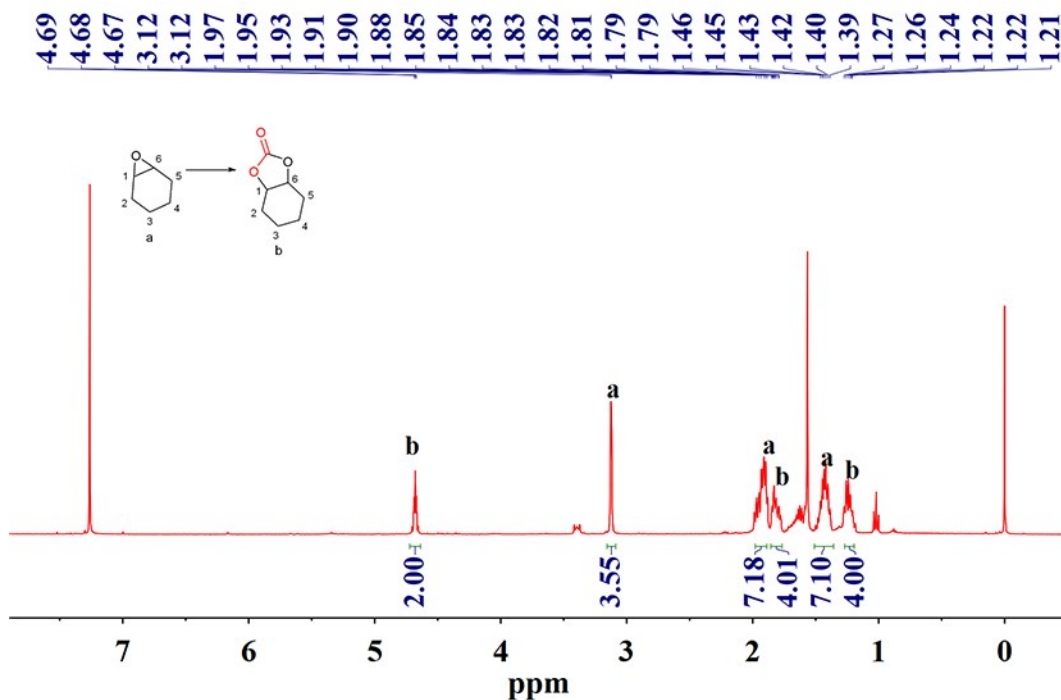

$^1\text{H NMR}$  (400 MHz,  $\text{CDCl}_3$ ):  $\text{H}^{\text{b}1}$  and  $\text{H}^{\text{b}6}$   $\delta$  4.75 – 4.60 (m, 2H),  $\text{H}^{\text{b}3}$  and  $\text{H}^{\text{b}4}$   $\delta$  1.93 (ddd,  $J$  = 19.6, 13.2, 6.3 Hz, 4H),  $\text{H}^{\text{b}2}$  and  $\text{H}^{\text{b}5}$   $\delta$  1.50 – 1.37 (m, 4H).  $[(\text{M}+\text{H})^+]$ : 143.0 (calculated  $m/z$  142.1).

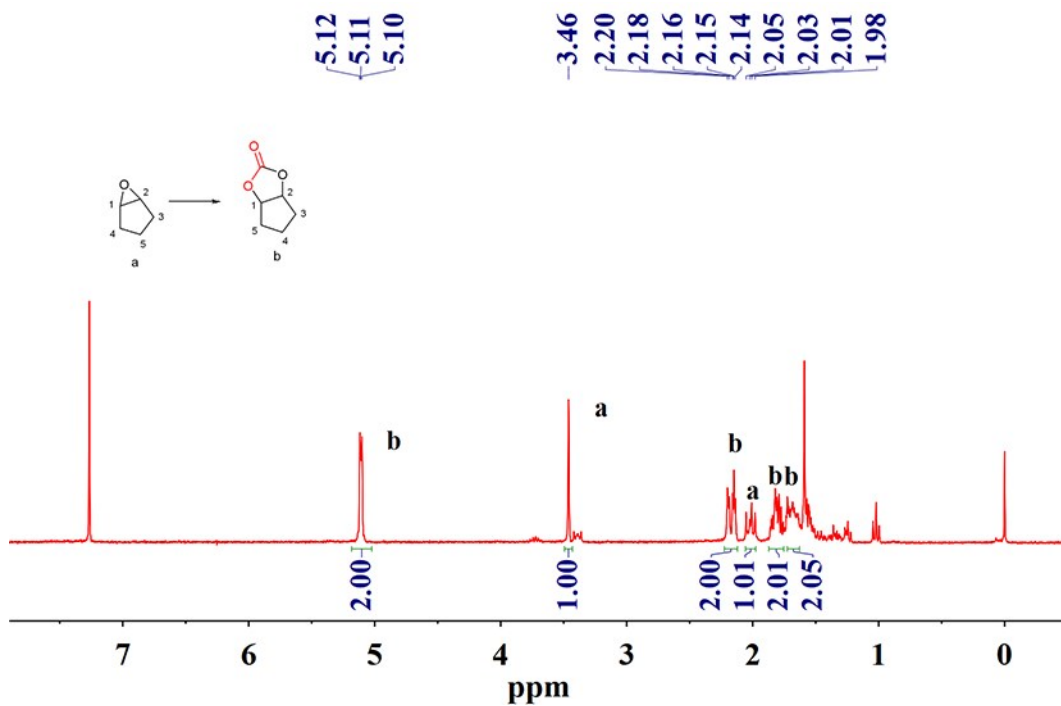

<sup>1</sup>H NMR (300 MHz, CDCl<sub>3</sub>) δ 5.14 – 5.08 (m, 2H), 2.25 – 2.11 (m, 2H), 1.87 – 1.74 (m, 2H), 1.74 – 1.62 (m, 2H).

Due to the influence of moisture in CDCl<sub>3</sub>, H<sup>b5</sup> is not discussed. [(M+H)<sup>+</sup>]: 129.0 (calculated m/z 128.1).

### 10. <sup>1</sup>H NMR spectra of substrates and products under 80 °C<sup>7-12</sup>

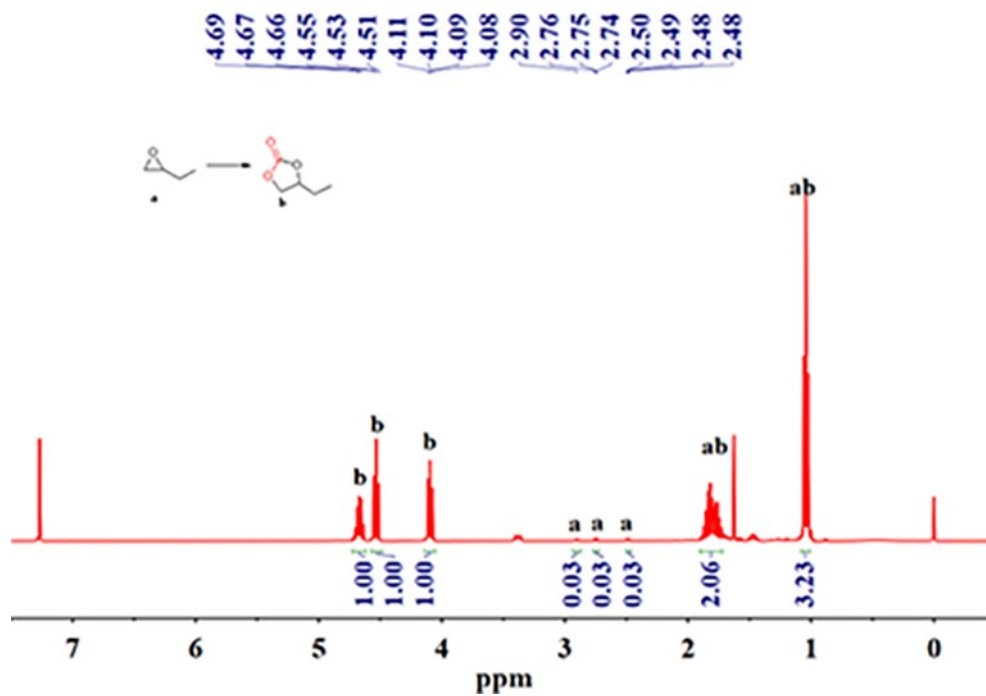

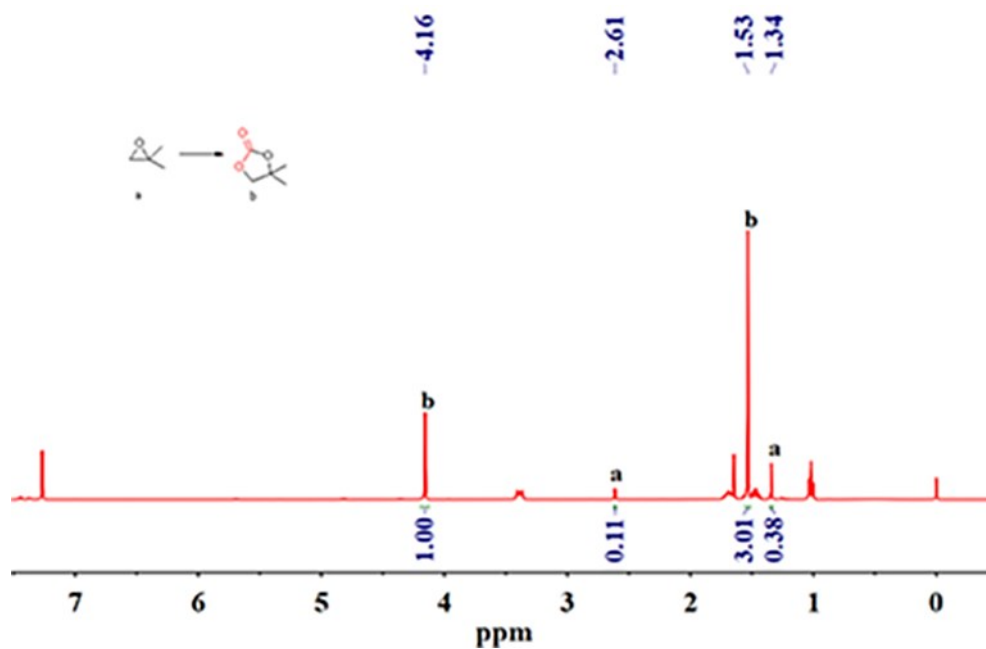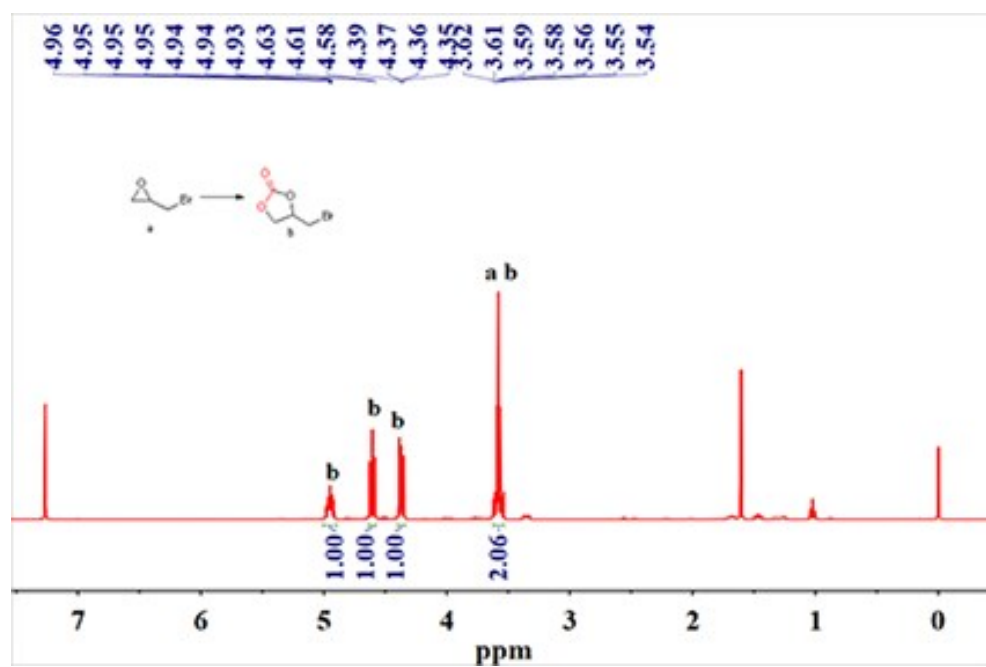

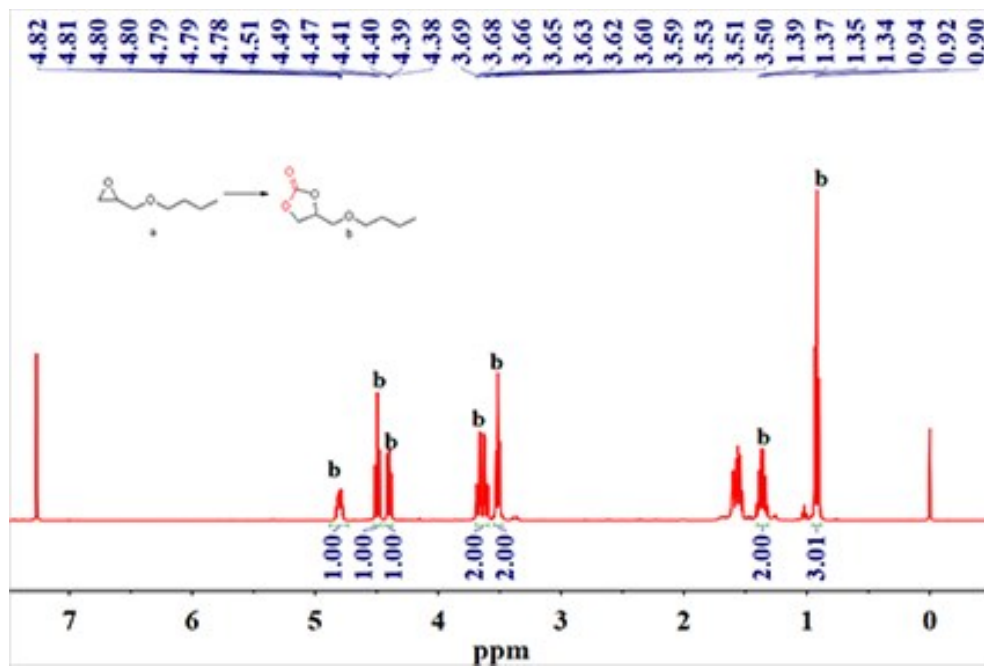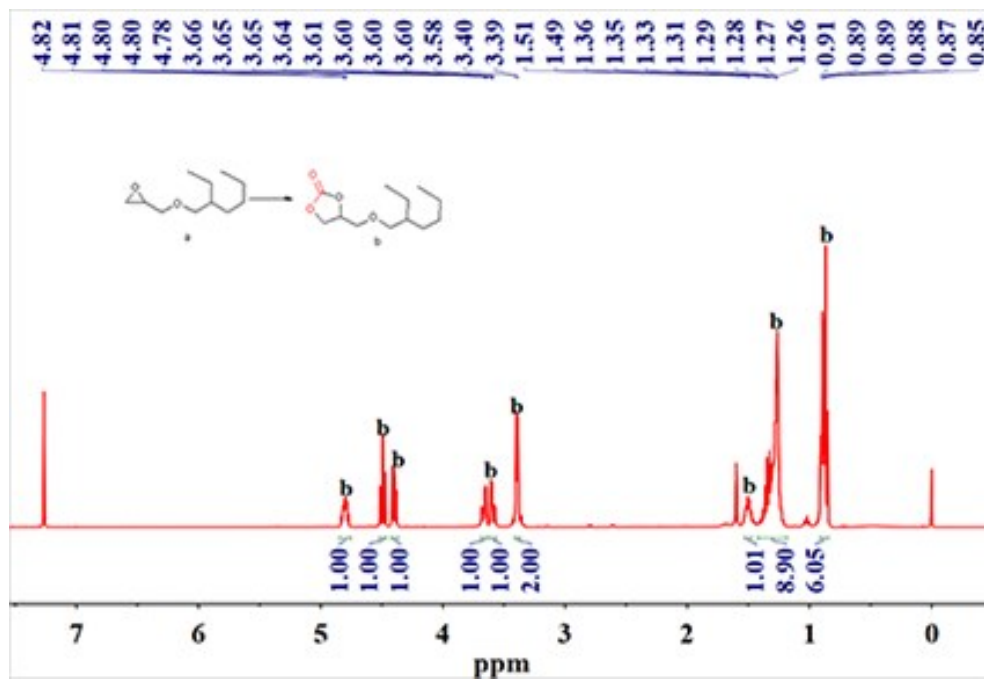

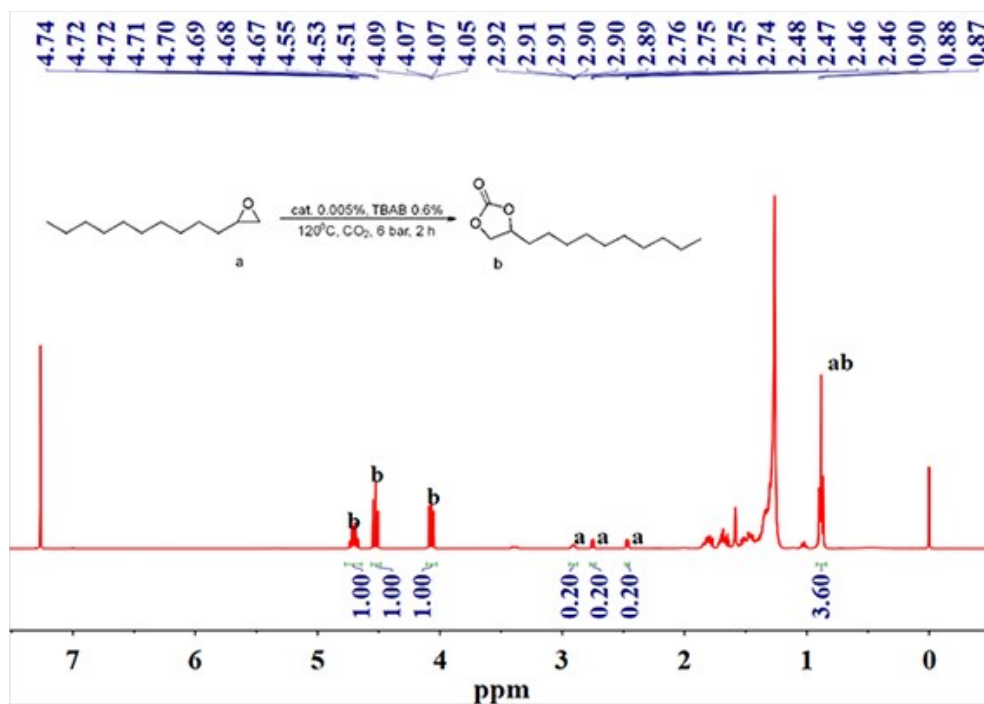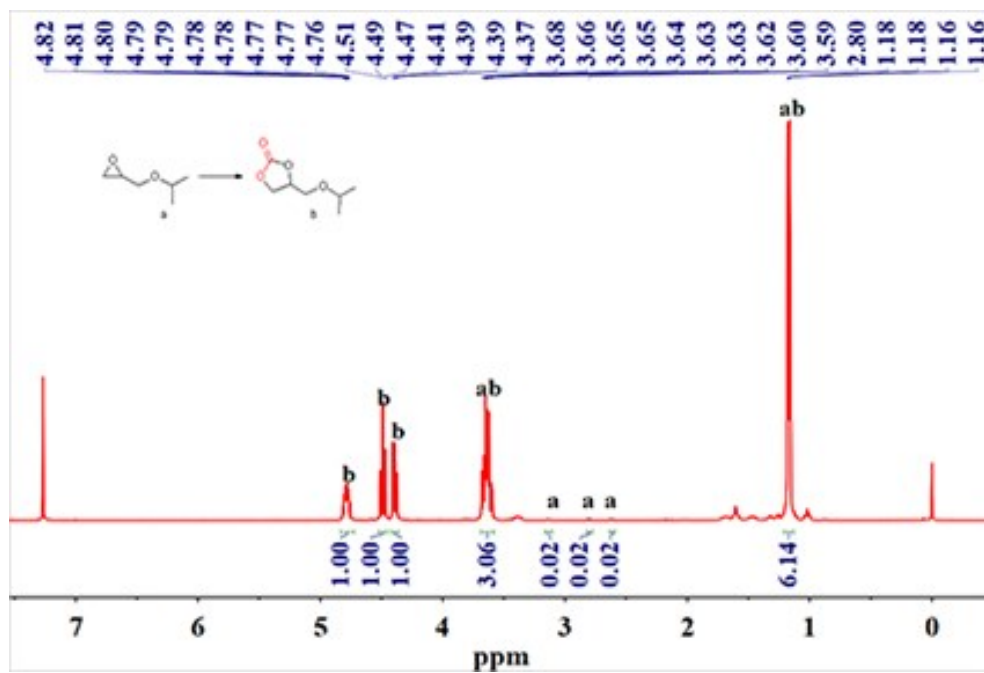

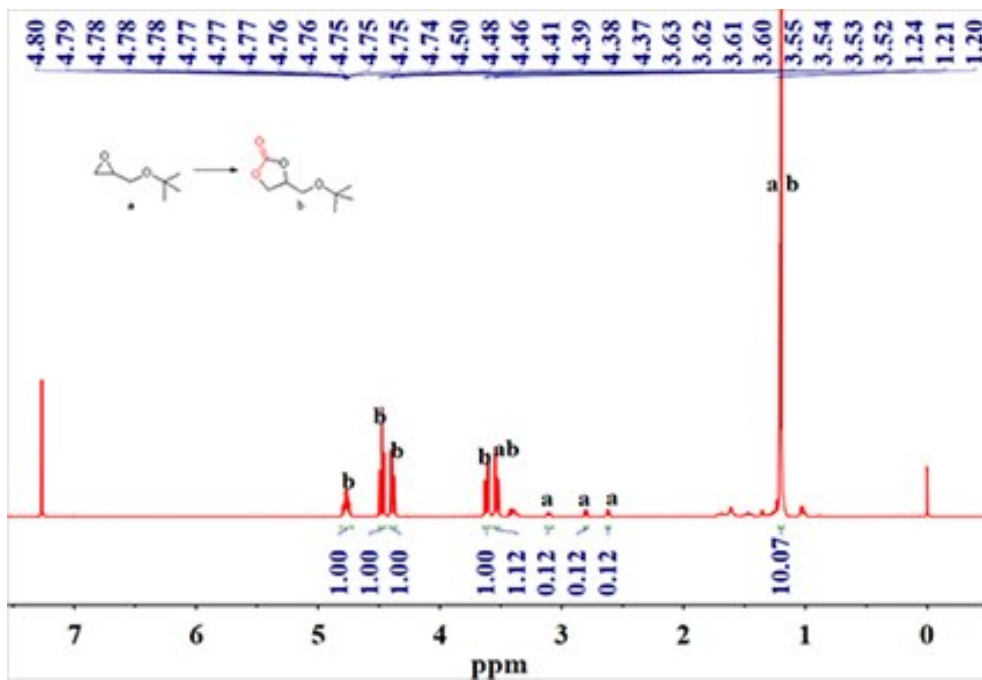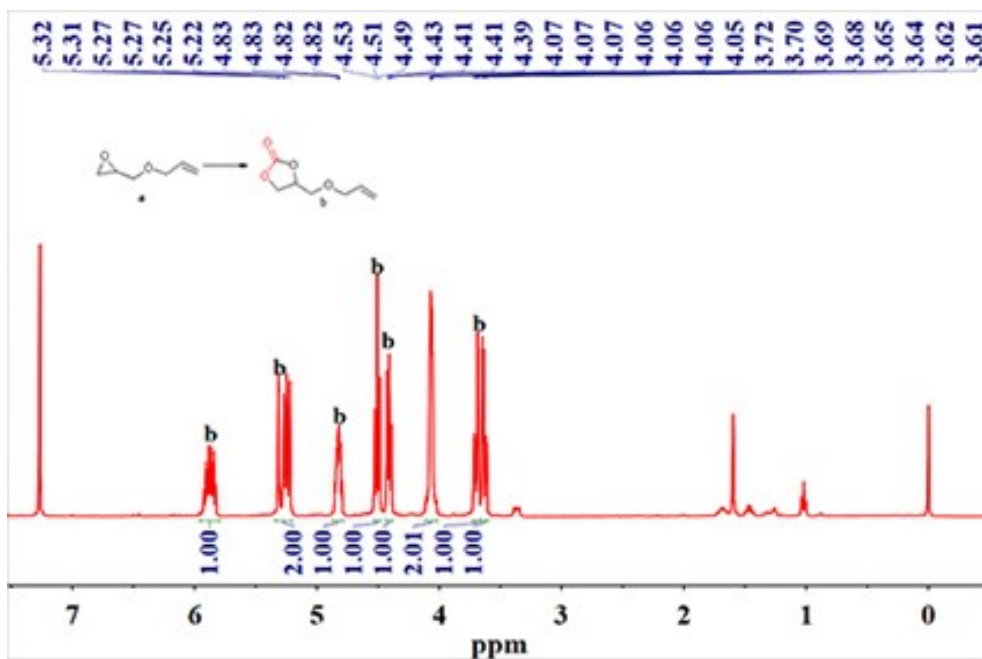

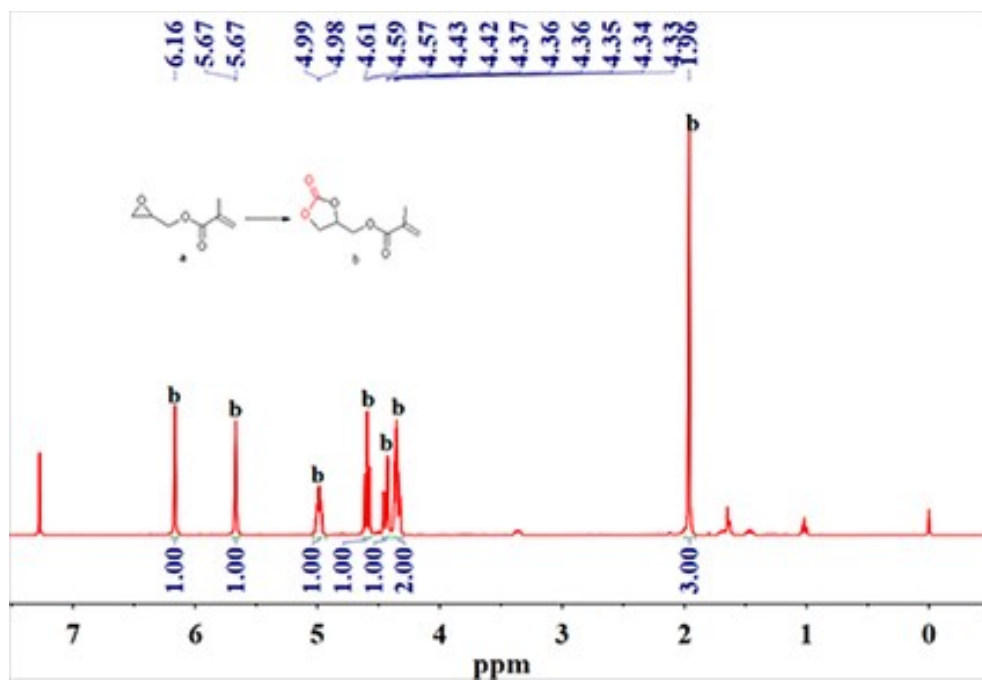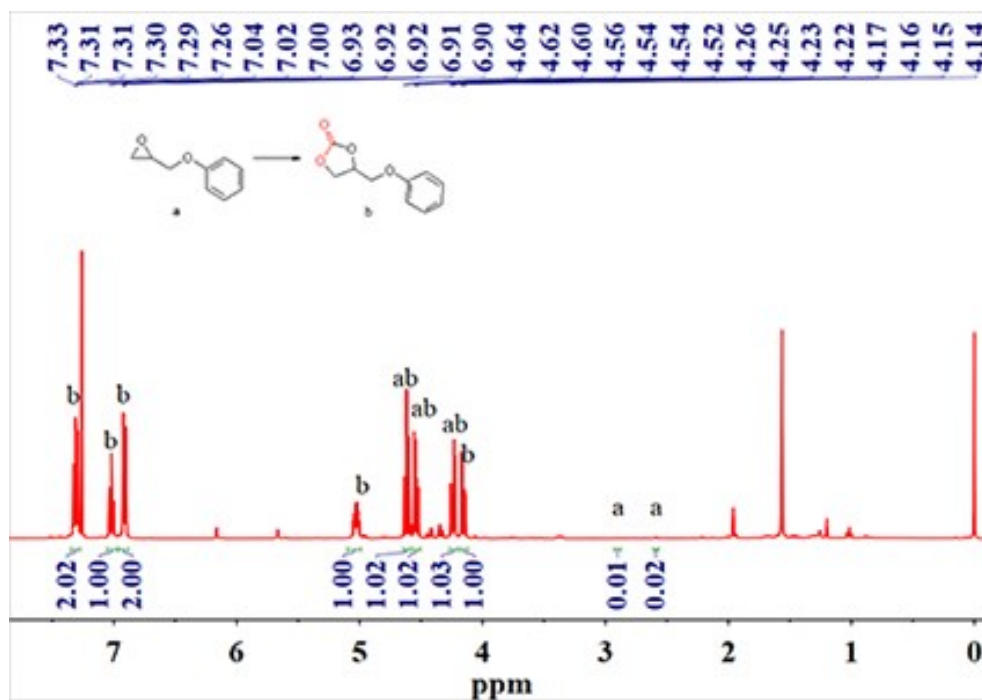

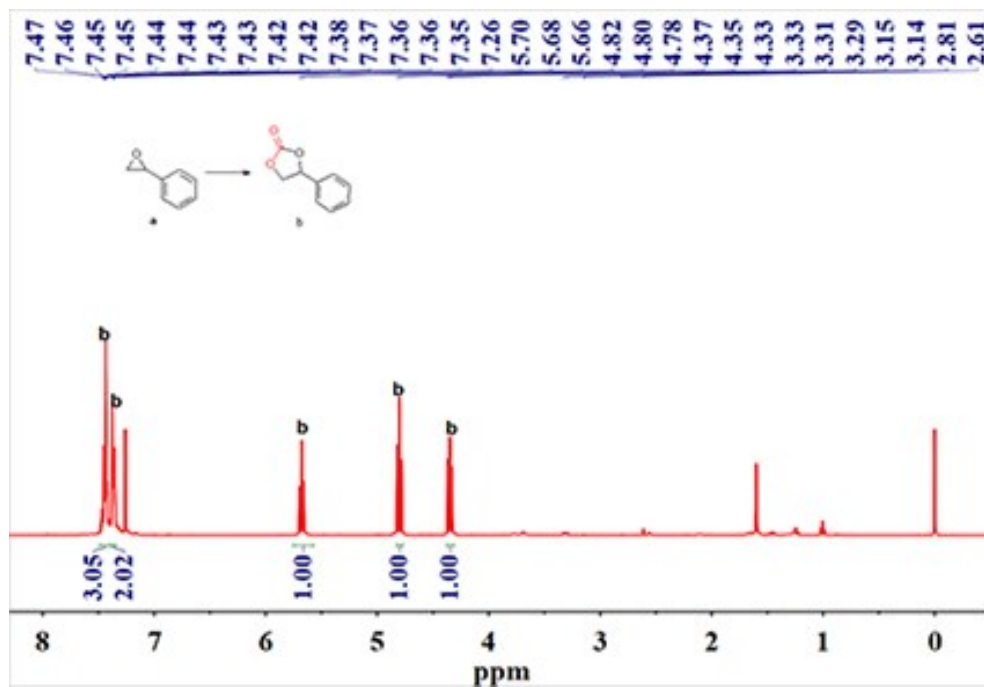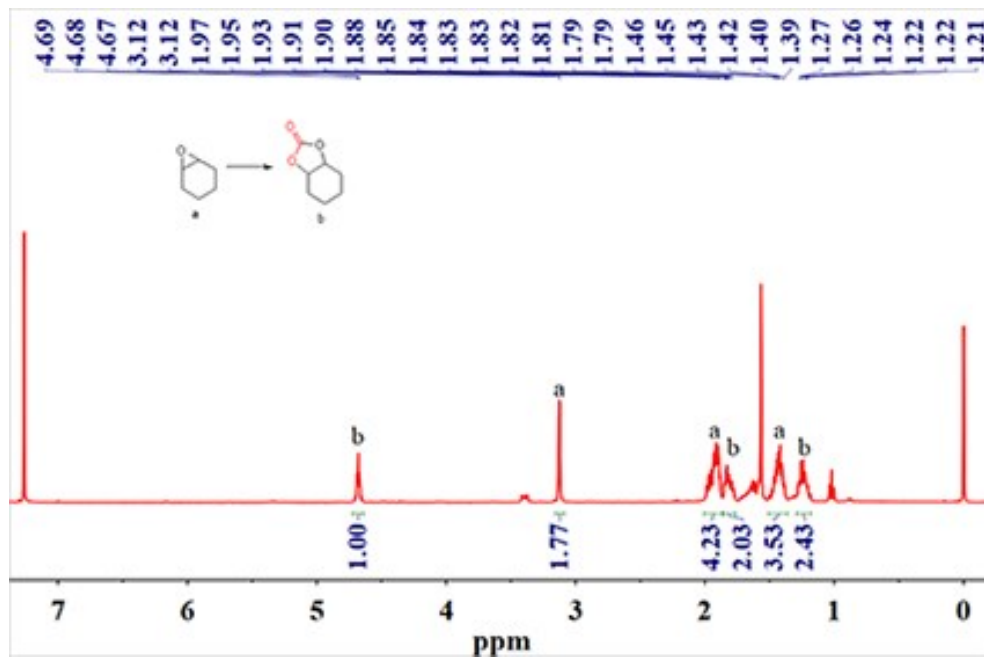



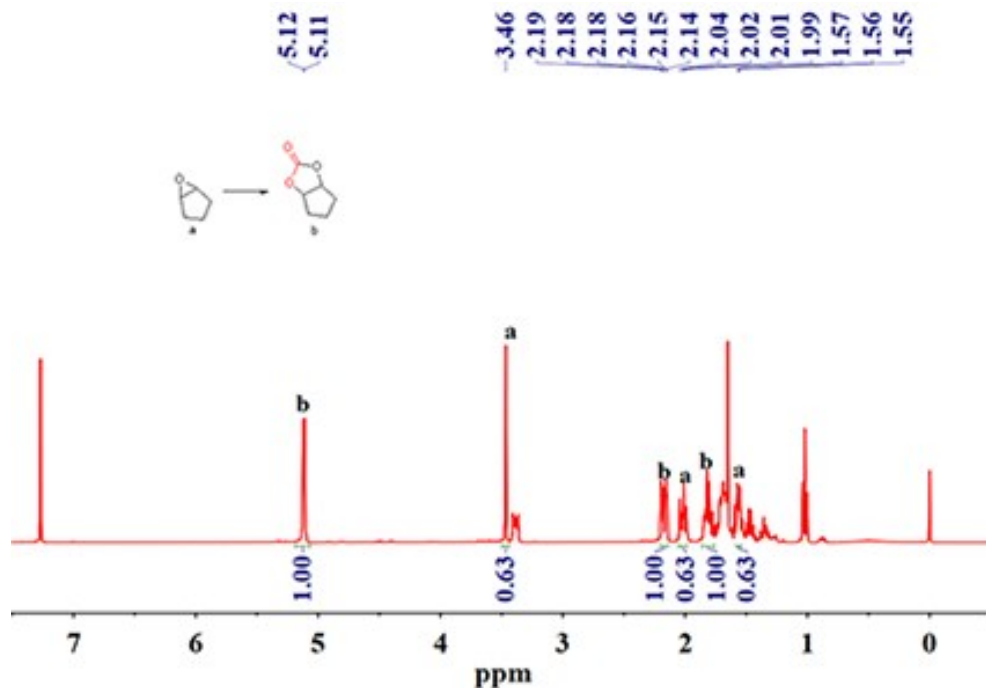

## 11. Notes and references

1. R. Ma, L.-N. He and Y.-B. Zhou, *Green Chem.*, 2016, **18**, 226-231.
2. Y. Xie, T.-T. Wang, R.-X. Yang, N.-Y. Huang, K. Zou and W.-Q. Deng, *ChemSusChem*, 2014, **7**, 2110-2114.
3. H. Xie, S. Li and S. Zhang, *J. Mol. Catal. A: Chem.*, 2006, **250**, 30-34.
4. F. Li, C. Xia, L. Xu, W. Sun and G. Chen, *Chem. Commun.*, 2003, DOI: 10.1039/B305617A, 2042-2043.
5. Q. Han, L. Wang, Z. Shi, C. Xu, Z. Dong, Z. Mou and W. Liu, *Chem. Asian J*, 2017, **12**, 1364-1373.
6. L. Wang, C. Xu, Q. Han, X. Tang, P. Zhou, R. Zhang, G. Gao, B. Xu, W. Qin and W. Liu, *Chem. Commun.*, 2018, **54**, 2212-2215.
7. L. Wang, R. Zhang, Q. Han, C. Xu, W. Chen, H. Yang, G. Gao, W. Qin and W. Liu, *Green Chem.*, 2018, **20**, 5311-5317.
8. G. Wang, C. Xu, L. Wang and W. Liu, *Dalton Trans.*, 2018, **47**, 12711-12717.
9. A. C. Shaikh, J. M. Veleta, J. Bloch, H. J. Goodman and T. L. Gianetti, *Eur. J. Org. Chem.*, 2020, DOI: 10.1002/ejoc.202000221, 2553-2559.
10. J. Qin, P. Wang, Q. Li, Y. Zhang, D. Yuan and Y. Yao, *Green Chem.*, 2014, **50**, 10952-10955.
11. Y. Ge, G. Cheng, N. Xu, W. Wang and H. Ke, *Catal. Sci. Technol.*, 2019, **9**, 4255-4261.
12. T. Biswas, A. Halder, K. S. Paliwal, A. Mitra, G. Tudu, R. Banerjee and V. Mahalingam, *Chem. Asian J*, 2020, **15**, 1683-1687.
